# Supplementary material for: Sperm-borne miR-216b modulates cell proliferation during early embryo development via K-RAS
Source: PubMed Central journal article supplement (PMC6637201; doi:10.1038/s41598-019-46775-8), 2019-07-17
Supplement: 41598_2019_46775_MOESM1_ESM.pdf [file 41598_2019_46775_MOESM1_ESM.pdf]

**Title: Sperm-borne miR-216b modulates cell proliferation during early embryo development via *K-RAS***

**Authors:** Maíra Bianchi Rodrigues Alves<sup>1</sup>, Rubens Paes de Arruda<sup>1</sup>, Tiago Henrique Camara De Bem<sup>2</sup>, Shirley Andrea Florez-Rodriguez<sup>1</sup>, Manoel Francisco de Sá Filho<sup>1,3</sup>, Clémence Belleannée<sup>4</sup>, Flávio Vieira Meirelles<sup>2</sup>, Juliano Coelho da Silveira<sup>2</sup>, Felipe Perecin<sup>2</sup>, and Eneiva Carla Carvalho Celeghini<sup>1\*</sup>

<sup>1</sup>Department of Animal Reproduction, School of Veterinary Medicine and Animal Science, Universidade de São Paulo, Pirassununga, São Paulo, Brazil.

<sup>2</sup>Department of Veterinary Medicine, School of Animal Science and Food Engineering, Universidade de São Paulo, Pirassununga, São Paulo, Brazil.

<sup>3</sup>Alta Genetics of Brazil, Uberaba, Minas Gerais, Brazil.

<sup>4</sup>Department of Obstetrics, Gynecology and Reproduction, Université Laval, Quebec, Quebec, Canada.

\*Correspondence: Professor Eneiva Carla Carvalho Celeghini. E-mail: celeghin@usp.br. Street Duque de Caxias Norte, 225 – Pirassununga – Brazil – Zip code 13635-900. Tel: +55 19 3565 4242.

**Supplementary Table S1.** Mean and SEM of sperm quality characteristics evaluated in three commercial semen batches from each bull. <sup>a,b</sup> Different letters on the same line indicate statistical difference ( $P < 0.05$ ) between fertility groups. <sup>1</sup>High fertility; <sup>2</sup> Low fertility; <sup>3</sup>Sperm with plasma and acrosome membrane integrity and high mitochondrial membrane potential; <sup>4</sup>Production of ROS (reactive oxygen species). SEM: standard error of the mean.

| Sperm quality analyses of all straws                                                 | Fertility groups       |                        |
|--------------------------------------------------------------------------------------|------------------------|------------------------|
|                                                                                      | HF <sup>1</sup> (n=9)  | LF <sup>2</sup> (n=9)  |
| <i>Sperm conventional analyses</i>                                                   |                        |                        |
| Straw volume (mL)                                                                    | 0.25                   | 0.25                   |
| Subjective motility (%)                                                              | 66.4±1.1               | 63.3±1.1               |
| Vigor (1-5)                                                                          | 3.4±0.1                | 3.3±0.1                |
| Sperm concentration (×10 <sup>6</sup> sperm/mL)                                      | 100.9±5.4              | 90.8±4.7               |
| Major defects (%)                                                                    | 18.7±2.0 <sup>b</sup>  | 25.0±0.9 <sup>a</sup>  |
| Minor defects (%)                                                                    | 4.6±1.1                | 4.2±0.7                |
| Total defects (%)                                                                    | 23.4±2.6               | 29.2±1.1               |
| Total of sperm/straw (×10 <sup>6</sup> )                                             | 25.2±1.4               | 22.7±1.2               |
| Total of motility sperm/straw (×10 <sup>6</sup> )                                    | 17.1±0.8 <sup>a</sup>  | 13.5±0.8 <sup>b</sup>  |
| <i>Sperm motility characteristics</i>                                                |                        |                        |
| Total motility (%)                                                                   | 76.7±1.9               | 71.9±1.7               |
| Progressive motility (%)                                                             | 54.7±2.0               | 52.5±1.7               |
| Rapid cells (%)                                                                      | 70.5±1.7               | 66.7±1.6               |
| Curvilinear velocity (VCL; μm/s)                                                     | 145.8±2.6 <sup>b</sup> | 172.8±3.7 <sup>a</sup> |
| Progressive velocity (VSL; μm/s)                                                     | 78.3±2.7               | 83.9±1.9               |
| Path velocity (VAP; μm/s)                                                            | 97.4±1.5 <sup>b</sup>  | 105.4±1.6 <sup>a</sup> |
| Linearity (LIN; %)                                                                   | 53.7±1.6 <sup>a</sup>  | 48.7±1.0 <sup>b</sup>  |
| Straightness (STR; %)                                                                | 81.1±1.4               | 80.6±0.9               |
| Wobble (WOB; %)                                                                      | 66.0±1.0 <sup>a</sup>  | 60.4±0.8 <sup>b</sup>  |
| Lateral head displacement (ALH; μm)                                                  | 2.7±0.04 <sup>b</sup>  | 3.4±0.1 <sup>a</sup>   |
| Beat cross frequency (BCF; Hz)                                                       | 22.3±0.3               | 23.1±0.5               |
| <i>Sperm membranes integrity, mitochondrial membrane function and ROS production</i> |                        |                        |
| PIAIH <sup>3</sup> (%)                                                               | 42.7±2.4               | 42.1±1.8               |
| Plasma membrane integrity (%)                                                        | 44.4±2.4               | 46.8±2.6               |
| Acrosome membrane integrity (%)                                                      | 53.4±2.4               | 57.7±1.4               |
| High mitochondrial membrane potential (%)                                            | 58.0±3.2               | 52.6±2.8               |
| ROS <sup>4</sup> (%)                                                                 | 6.1±1.3 <sup>b</sup>   | 10.6±1.5 <sup>a</sup>  |

**Supplementary Table S2.** Individual characteristics and values obtained for all three commercial semen batches from each bull in order to select the best batch from each bull. Bold text indicates the selected batch of each bull. HF: high fertility; LF: low fertility. <sup>1</sup>Progressive motility; <sup>2</sup>Major defects; <sup>3</sup>Minor defects; <sup>4</sup>Sperm with plasma and acrosome membranes integrity and high mitochondrial membrane potential; <sup>5</sup>Value obtained by the formula:  $(1 \times \text{PROG}) + [(3 \times (100 - \text{MAJ}))] + [(2 \times (100 - \text{MIN}))] + (3 \times \text{PIAIH})$ .

| Bull | Batch    | PROG <sup>1</sup> (%) | MAJ <sup>2</sup> (%) | MIN <sup>3</sup> (%) | PIAIH <sup>4</sup> (%) | Value <sup>5</sup> |
|------|----------|-----------------------|----------------------|----------------------|------------------------|--------------------|
| HF-1 | <b>1</b> | <b>54.1</b>           | <b>20.7</b>          | <b>9.2</b>           | <b>58.2</b>            | <b>648.2</b>       |
|      | 2        | 52.8                  | 13.2                 | 2.4                  | 34.2                   | 611.0              |
|      | 3        | 43.2                  | 22.0                 | 7.2                  | 37.2                   | 574.4              |
| HF-2 | 1        | 55.0                  | 7.7                  | 1.5                  | 45.7                   | 666.0              |
|      | 2        | 59.3                  | 16.2                 | 1.7                  | 49.0                   | 654.3              |
|      | <b>3</b> | <b>68.5</b>           | <b>9.0</b>           | <b>3.0</b>           | <b>43.5</b>            | <b>666.0</b>       |
| HF-3 | <b>1</b> | <b>49.2</b>           | <b>20.0</b>          | <b>7.2</b>           | <b>45.2</b>            | <b>610.4</b>       |
|      | 2        | 60.0                  | 33.0                 | 4.7                  | 41.7                   | 576.7              |
|      | 3        | 50.0                  | 26.7                 | 4.7                  | 29.7                   | 549.6              |
| LF-1 | <b>1</b> | <b>49.7</b>           | <b>23.2</b>          | <b>3.7</b>           | <b>37.7</b>            | <b>585.8</b>       |
|      | 2        | 48.4                  | 19.7                 | 4.0                  | 33.7                   | 582.4              |
|      | 3        | 46.0                  | 23.2                 | 3.0                  | 35.7                   | 577.5              |
| LF-2 | 1        | 49.4                  | 27.7                 | 3.5                  | 39.2                   | 576.9              |
|      | 2        | 57.5                  | 26.7                 | 6.0                  | 38.5                   | 580.9              |
|      | <b>3</b> | <b>63.1</b>           | <b>27.2</b>          | <b>6.0</b>           | <b>40.5</b>            | <b>591.0</b>       |
| LF-3 | 1        | 51.1                  | 30.7                 | 4.0                  | 46.7                   | 591.1              |
|      | 2        | 44.5                  | 24.2                 | 4.2                  | 49.2                   | 611.1              |
|      | <b>3</b> | <b>62.5</b>           | <b>22.</b>           | <b>3.2</b>           | <b>57.2</b>            | <b>661.7</b>       |

**Supplementary Table S3.** Mean and SEM of sperm quality characteristics evaluated in each of the three commercial semen batches from HF-1, HF-2 and HF-3 bulls. Bold text indicates the selected batch. <sup>1</sup>High fertility; <sup>2</sup>Sperm with plasma and acrosome membranes integrity and high mitochondrial membrane potential; <sup>3</sup>Production of ROS (reactive oxygen species). SEM: standard error of the mean.

| Sperm quality                                 | Semen batches from high fertility bulls |                            |                            |                             |                              |                             |                              |                               |                              |
|-----------------------------------------------|-----------------------------------------|----------------------------|----------------------------|-----------------------------|------------------------------|-----------------------------|------------------------------|-------------------------------|------------------------------|
|                                               | <b>HF<sup>1</sup>-1-1</b>               | HF <sup>1</sup> -1-2       | HF <sup>1</sup> -1-3       | HF <sup>1</sup> -2-1        | HF <sup>1</sup> -2-2         | <b>HF<sup>1</sup>-2-3</b>   | <b>HF<sup>1</sup>-3-1</b>    | HF <sup>1</sup> -3-2          | HF <sup>1</sup> -3-3         |
| Total sperm ( $\times 10^6$ )                 | 19.4 $\pm$ 5.0                          | 33.7 $\pm$ 1.9             | 26.2 $\pm$ 3.1             | 29.9 $\pm$ 4.1              | 21.6 $\pm$ 2.2               | 28.1 $\pm$ 5.0              | 20.0 $\pm$ 1.2               | 27.5 $\pm$ 3.1                | 24.4 $\pm$ 5.0               |
| Total sperm with motility ( $\times 10^6$ )   | 12.9 $\pm$ 2.9                          | 21.0 $\pm$ 0.3             | 16.3 $\pm$ 1.3             | 18.2 $\pm$ 4.2              | 13.9 $\pm$ 0.3               | 19.1 $\pm$ 4.1              | 14.0 $\pm$ 0.9               | 19.2 $\pm$ 2.2                | 15.6 $\pm$ 2.03              |
| Subjective motility (%)                       | 67.5 $\pm$ 2.5                          | 62.5 $\pm$ 2.5             | 62.5 $\pm$ 2.5             | 67.5 $\pm$ 7.5              | 65.0 $\pm$ 5.0               | 67.5 $\pm$ 2.5              | 70.0 $\pm$ 0.0               | 70.0 $\pm$ 0.0                | 65.0 $\pm$ 5.0               |
| Vigor (1-5)                                   | 3.2 $\pm$ 0.2 <sup>ab</sup>             | 3.5 $\pm$ 0.0 <sup>a</sup> | 2.5 $\pm$ 0.0 <sup>b</sup> | 3.5 $\pm$ 0.0               | 3.5 $\pm$ 0.0                | 3.7 $\pm$ 0.2               | 3.5 $\pm$ 0.0                | 3.5 $\pm$ 0.0                 | 3.5 $\pm$ 0.0                |
| Sperm concentration ( $\times 10^6$ sperm/mL) | 77.5 $\pm$ 20.0                         | 135.0 $\pm$ 7.5            | 105.0 $\pm$ 12.5           | 103.7 $\pm$ 16.2            | 86.2 $\pm$ 8.7               | 112.5 $\pm$ 20.0            | 80.0 $\pm$ 5.0               | 110.0 $\pm$ 12.5              | 97.5 $\pm$ 2                 |
| Major defects (%)                             | 20.7 $\pm$ 3.2                          | 13.2 $\pm$ 2.2             | 22.0 $\pm$ 4.0             | 7.7 $\pm$ 0.2 <sup>b</sup>  | 16.2 $\pm$ 1.2 <sup>a</sup>  | 8.7 $\pm$ 2.2 <sup>ab</sup> | 20.0 $\pm$ 5.0               | 33.0 $\pm$ 1.5                | 26.7 $\pm$ 2.2               |
| Minor defects (%)                             | 9.2 $\pm$ 6.7                           | 2.4 $\pm$ 1.4              | 7.2 $\pm$ 5.7              | 1.5 $\pm$ 0.0               | 1.7 $\pm$ 0.7                | 3.0 $\pm$ 2.0               | 7.2 $\pm$ 5.2                | 4.7 $\pm$ 0.7                 | 4.7 $\pm$ 3.2                |
| Total defects (%)                             | 30.0 $\pm$ 3.5                          | 15.5 $\pm$ 3.5             | 29.2 $\pm$ 9.7             | 9.2 $\pm$ 0.2               | 18.0 $\pm$ 2.0               | 11.7 $\pm$ 4.2              | 25.2 $\pm$ 10.2              | 37.7 $\pm$ 2.2                | 31.5 $\pm$ 5.5               |
| Total motility (%)                            | 81.2 $\pm$ 4.6                          | 75.1 $\pm$ 6.0             | 72.2 $\pm$ 4.0             | 70.5 $\pm$ 1.6              | 76.5 $\pm$ 2.9               | 80.5 $\pm$ 2.2              | 84.9 $\pm$ 1.6               | 85.4 $\pm$ 0.8                | 63.5 $\pm$ 7.5               |
| Progressive motility (%)                      | 54.1 $\pm$ 0.8                          | 52.8 $\pm$ 1.3             | 43.2 $\pm$ 12.5            | 55.0 $\pm$ 0.9 <sup>b</sup> | 59.3 $\pm$ 3.1 <sup>ab</sup> | 68.2 $\pm$ 1.5 <sup>a</sup> | 49.2 $\pm$ 2.1               | 60.0 $\pm$ 4.5                | 50.0 $\pm$ 1.3               |
| Rapid cells (%)                               | 76.0 $\pm$ 4.2                          | 70.1 $\pm$ 4.5             | 65.2 $\pm$ 1.0             | 64.1 $\pm$ 0.9 <sup>b</sup> | 69.9 $\pm$ 2.4 <sup>ab</sup> | 75.5 $\pm$ 0.4 <sup>a</sup> | 75.1 $\pm$ 1.6               | 79.3 $\pm$ 2.5                | 59.0 $\pm$ 7.7               |
| Curvilinear velocity (VCL; $\mu$ m/s)         | 160.3 $\pm$ 2.8                         | 158.1 $\pm$ 7.1            | 136.5 $\pm$ 11.1           | 149.7 $\pm$ 12.7            | 146.9 $\pm$ 1.3              | 139.8 $\pm$ 0.7             | 133.9 $\pm$ 2.7 <sup>b</sup> | 140.0 $\pm$ 1.1 <sup>ab</sup> | 146.7 $\pm$ 0.4 <sup>a</sup> |

|                                                 |                              |                             |                             |                 |                |                 |                              |                             |                             |
|-------------------------------------------------|------------------------------|-----------------------------|-----------------------------|-----------------|----------------|-----------------|------------------------------|-----------------------------|-----------------------------|
| Progressive velocity (VSL; $\mu\text{m/s}$ )    | 75.9 $\pm$ 1.9               | 80.0 $\pm$ 80.1             | 62.6 $\pm$ 12.9             | 88.5 $\pm$ 4.9  | 81.9 $\pm$ 0.5 | 87.2 $\pm$ 4.6  | 63.8 $\pm$ 1.1               | 80.5 $\pm$ 5.7              | 84.5 $\pm$ 7.8              |
| Path velocity (VAP; $\mu\text{m/s}$ )           | 99.1 $\pm$ 1.0               | 100.5 $\pm$ 5.2             | 81.7 $\pm$ 7.7              | 102.7 $\pm$ 5.9 | 97.0 $\pm$ 0.2 | 99.4 $\pm$ 2.9  | 86.4 $\pm$ 0.05              | 99.5 $\pm$ 4.5              | 98.7 $\pm$ 4.9              |
| Linearity (LIN; %)                              | 47.3 $\pm$ 0.3               | 50.4 $\pm$ 2.8              | 45.3 $\pm$ 5.7              | 59.3 $\pm$ 1.7  | 55.8 $\pm$ 0.8 | 62.3 $\pm$ 2.9  | 47.7 $\pm$ 1.8               | 57.5 $\pm$ 3.6              | 57.6 $\pm$ 5.2              |
| Straightness (STR; %)                           | 76.5 $\pm$ 1.1               | 79.4 $\pm$ 3.9              | 75.7 $\pm$ 8.6              | 86.2 $\pm$ 0.2  | 84.4 $\pm$ 0.3 | 87.6 $\pm$ 2.0  | 73.8 $\pm$ 1.3               | 80.8 $\pm$ 2.1              | 85.4 $\pm$ 3.6              |
| Wobble (WOB; %)                                 | 61.8 $\pm$ 0.4 <sup>ab</sup> | 63.5 $\pm$ 0.4 <sup>a</sup> | 59.8 $\pm$ 0.7 <sup>b</sup> | 68.7 $\pm$ 1.8  | 66.0 $\pm$ 0.7 | 71.1 $\pm$ 1.7  | 64.7 $\pm$ 1.1               | 71.0 $\pm$ 2.6              | 67.2 $\pm$ 3.1              |
| Lateral head displacement (ALH; $\mu\text{m}$ ) | 2.8 $\pm$ 0.05               | 2.7 $\pm$ 0.05              | 2.7 $\pm$ 0.1               | 2.7 $\pm$ 0.2   | 2.7 $\pm$ 0.0  | 2.4 $\pm$ 0.05  | 2.6 $\pm$ 0.1                | 2.4 $\pm$ 0.0               | 2.7 $\pm$ 0.1               |
| Beat cross frequency (BCF; Hz)                  | 21.8 $\pm$ 0.8               | 23.6 $\pm$ 1.4              | 21.0 $\pm$ 1.4              | 23.6 $\pm$ 0.4  | 23.2 $\pm$ 0.5 | 23.0 $\pm$ 0.05 | 20.5 $\pm$ 0.05 <sup>b</sup> | 20.9 $\pm$ 0.2 <sup>b</sup> | 22.7 $\pm$ 0.1 <sup>a</sup> |
| PIAIH <sup>2</sup> (%)                          | 58.2 $\pm$ 2.7 <sup>a</sup>  | 34.2 $\pm$ 3.2 <sup>b</sup> | 37.2 $\pm$ 1.7 <sup>b</sup> | 45.7 $\pm$ 8.7  | 49.0 $\pm$ 8.0 | 43.2 $\pm$ 4.7  | 45.2 $\pm$ 3.7 <sup>a</sup>  | 41.7 $\pm$ 1.7 <sup>a</sup> | 29.7 $\pm$ 1.7 <sup>b</sup> |
| Plasma membrane integrity (%)                   | 61.5 $\pm$ 0.0 <sup>a</sup>  | 35.2 $\pm$ 3.2 <sup>b</sup> | 39.0 $\pm$ 2.5 <sup>b</sup> | 47.0 $\pm$ 1    | 49.7 $\pm$ 8.7 | 44.7 $\pm$ 4.7  | 48.2 $\pm$ 3.7 <sup>a</sup>  | 43.7 $\pm$ 1.7 <sup>a</sup> | 30.5 $\pm$ 1.0 <sup>b</sup> |
| Acrosome membrane integrity (%)                 | 67.2 $\pm$ 6.7 <sup>a</sup>  | 41.2 $\pm$ 0.7 <sup>b</sup> | 44.7 $\pm$ 0.7 <sup>b</sup> | 55.2 $\pm$ 4.7  | 60.2 $\pm$ 9.7 | 55.0 $\pm$ 1.0  | 60.0 $\pm$ 6.0               | 56.0 $\pm$ 2.0              | 41.0 $\pm$ 2.0              |
| High mitochondrial membrane potential (%)       | 78.0 $\pm$ 6.5               | 54.7 $\pm$ 11.2             | 73.0 $\pm$ 3.5              | 53.2 $\pm$ 11.2 | 56.7 $\pm$ 8.2 | 52.0 $\pm$ 9.5  | 57.7 $\pm$ 5.2               | 57.5 $\pm$ 6.0              | 39.0 $\pm$ 3.5              |
| ROS <sup>3</sup> (%)                            | 5.5 $\pm$ 0.5                | 16.5 $\pm$ 5.5              | 5.5 $\pm$ 1.5               | 5.5 $\pm$ 3.5   | 4.5 $\pm$ 3.5  | 3.5 $\pm$ 2.5   | 6.50 $\pm$ 5.5               | 39.5 $\pm$ 39.5             | 4.5 $\pm$ 1.5               |

**Supplementary Table S4.** Mean and SEM of sperm quality characteristics evaluated in each of the three commercial semen batches from LF-1, LF-2 and LF-3 bulls. Bold text indicates the selected batch. <sup>1</sup>Low fertility; <sup>2</sup>Sperm with plasma and acrosome membranes integrity and high mitochondrial membrane potential; <sup>3</sup>Production of ROS (reactive oxygen species). SEM: standard error of the mean.

| Sperm quality                                 | Semen batches from low fertility bulls |                      |                      |                      |                      |                           |                             |                             |                             |
|-----------------------------------------------|----------------------------------------|----------------------|----------------------|----------------------|----------------------|---------------------------|-----------------------------|-----------------------------|-----------------------------|
|                                               | <b>LF<sup>1</sup>-1-1</b>              | LF <sup>1</sup> -1-2 | LF <sup>1</sup> -1-3 | LF <sup>1</sup> -2-1 | LF <sup>1</sup> -2-2 | <b>LF<sup>1</sup>-2-3</b> | LF <sup>1</sup> -3-1        | LF <sup>1</sup> -3-2        | <b>LF<sup>1</sup>-3-3</b>   |
| Total sperm ( $\times 10^6$ )                 | 21.9 $\pm$ 1.9                         | 27.5 $\pm$ 5.6       | 23.7 $\pm$ 3.1       | 15.3 $\pm$ 0.3       | 20.3 $\pm$ 2.2       | 17.2 $\pm$ 1.6            | 26.2 $\pm$ 1.2              | 25.0 $\pm$ 1.2              | 27.2 $\pm$ 1.6              |
| Total sperm with motility ( $\times 10^6$ )   | 11.9 $\pm$ 0.1                         | 16.8 $\pm$ 4.7       | 13.9 $\pm$ 3.6       | 9.2 $\pm$ 0.2        | 11.5 $\pm$ 0.3       | 10.3 $\pm$ 0.93           | 17.1 $\pm$ 0.8              | 16.8 $\pm$ 0.2              | 18.3 $\pm$ 0.4              |
| Subjective motility (%)                       | 55.0 $\pm$ 5.0                         | 60.0 $\pm$ 5.0       | 57.5 $\pm$ 7.5       | 60.0 $\pm$ 0.0       | 57.5 $\pm$ 7.5       | 60.0 $\pm$ 0.0            | 65.0 $\pm$ 0.0              | 67.5 $\pm$ 2.5              | 67.5 $\pm$ 2.5              |
| Vigor (1-5)                                   | 3.5 $\pm$ 0.0                          | 3.2 $\pm$ 0.2        | 3.2 $\pm$ 0.2        | 3.2 $\pm$ 0.2        | 2.7 $\pm$ 0.2        | 3.0 $\pm$ 0.0             | 3.5 $\pm$ 0.0               | 3.5 $\pm$ 0.0               | 3.5 $\pm$ 0.0               |
| Sperm concentration ( $\times 10^6$ sperm/mL) | 87.5 $\pm$ 7.5                         | 110.0 $\pm$ 22.5     | 95.0 $\pm$ 12.5      | 61.25 $\pm$ 1.2      | 81.2 $\pm$ 8.7       | 68.7 $\pm$ 6.2            | 105.0 $\pm$ 5.0             | 100.0 $\pm$ 5.0             | 108.7 $\pm$ 6.2             |
| Major defects (%)                             | 23.2 $\pm$ 1.2                         | 19.7 $\pm$ 0.7       | 23.2 $\pm$ 1.2       | 27.7 $\pm$ 1.2       | 26.7 $\pm$ 2.7       | 27.2 $\pm$ 4.2            | 30.7 $\pm$ 0.2 <sup>a</sup> | 24.2 $\pm$ 0.2 <sup>b</sup> | 22.4 $\pm$ 1.5 <sup>b</sup> |
| Minor defects (%)                             | 3.7 $\pm$ 1.2                          | 4.0 $\pm$ 1.5        | 3.00 $\pm$ 1.5       | 3.5 $\pm$ 2.5        | 6.0 $\pm$ 4.5        | 6.0 $\pm$ 4.0             | 4.0 $\pm$ 2.0               | 4.2 $\pm$ 2.7               | 3.2 $\pm$ 1.30.0            |
| Total defects (%)                             | 27.0 $\pm$ 0.0                         | 23.7 $\pm$ 2.2       | 26.25 $\pm$ 2.7      | 31.2 $\pm$ 1.2       | 32.7 $\pm$ 7.2       | 33.2 $\pm$ 0.2            | 34.7 $\pm$ 1.7              | 28.5 $\pm$ 2.5              | 25.6 $\pm$ 2.8              |
| Total motility (%)                            | 63.8 $\pm$ 2.4                         | 67.4 $\pm$ 3.9       | 63.35 $\pm$ 2.1      | 74.5 $\pm$ 0.9       | 69.6 $\pm$ 1.7       | 76.4 $\pm$ 3.7            | 76.8 $\pm$ 6.2              | 73.8 $\pm$ 6.2              | 81.6 $\pm$ 2.9              |
| Progressive motility (%)                      | 49.7 $\pm$ 3.9                         | 48.4 $\pm$ 5.5       | 46.05 $\pm$ 1.8      | 49.4 $\pm$ 3.5       | 57.5 $\pm$ 0.4       | 63.1 $\pm$ 2.7            | 51.1 $\pm$ 0.3 <sup>b</sup> | 44.5 $\pm$ 0.5 <sup>c</sup> | 62.5 $\pm$ 1.6 <sup>a</sup> |
| Rapid cells (%)                               | 60.7 $\pm$ 3.3                         | 61.5 $\pm$ 7.3       | 59.50 $\pm$ 2.1      | 66.0 $\pm$ 2.1       | 67.5 $\pm$ 2.2       | 70.3 $\pm$ 4.0            | 70.3 $\pm$ 4.1              | 67.4 $\pm$ 3.2              | 76.7 $\pm$ 2.5              |
| Curvilinear velocity (VCL; $\mu$ m/s)         | 185.5 $\pm$ 2.7                        | 184.9 $\pm$ 5.1      | 186.9 $\pm$ 7.6      | 150.4 $\pm$ 7.4      | 160.0 $\pm$ 7.3      | 150.7 $\pm$ 3.7           | 181.1 $\pm$ 6.5             | 175.6 $\pm$ 0.4             | 179.8 $\pm$ 6.6             |

|                                                 |                 |                 |                 |                 |                 |                |                               |                             |                             |
|-------------------------------------------------|-----------------|-----------------|-----------------|-----------------|-----------------|----------------|-------------------------------|-----------------------------|-----------------------------|
| Progressive velocity (VSL; $\mu\text{m/s}$ )    | 86.9 $\pm$ 0.8  | 84.6 $\pm$ 3.0  | 87.7 $\pm$ 6.1  | 70.5 $\pm$ 7.0  | 87.9 $\pm$ 0.6  | 81.6 $\pm$ 3.9 | 86.9 $\pm$ 7.9                | 75.4 $\pm$ 1.5              | 93.5 $\pm$ 1.8              |
| Path velocity (VAP; $\mu\text{m/s}$ )           | 105.3 $\pm$ 0.4 | 104.8 $\pm$ 3.0 | 108.5 $\pm$ 6.4 | 90.8 $\pm$ 9.0  | 105.2 $\pm$ 2.0 | 94.7 $\pm$ 3.1 | 110.4 $\pm$ 4.4               | 102.8 $\pm$ 1.1             | 114.2 $\pm$ 3.1             |
| Linearity (LIN; %)                              | 46.8 $\pm$ 0.2  | 45.7 $\pm$ 0.3  | 46.9 $\pm$ 1.4  | 46.7 $\pm$ 2.3  | 55.1 $\pm$ 2.9  | 54.1 $\pm$ 1.2 | 47.90 $\pm$ 2.0               | 43.0 $\pm$ 0.8              | 52.0 $\pm$ 0.8              |
| Straightness (STR; %)                           | 82.6 $\pm$ 0.4  | 80.7 $\pm$ 0.6  | 80.8 $\pm$ 0.85 | 77.6 $\pm$ 0.05 | 83.6 $\pm$ 2.1  | 86.1 $\pm$ 1.2 | 78.60 $\pm$ 4.0               | 73.4 $\pm$ 0.7              | 81.9 $\pm$ 0.6              |
| Wobble (WOB; %)                                 | 56.8 $\pm$ 0.6  | 57.7 $\pm$ 0.1  | 58.0 $\pm$ 1.1  | 60.2 $\pm$ 3.0  | 65.8 $\pm$ 1.8  | 62.8 $\pm$ 0.5 | 60.90 $\pm$ 0.2 <sup>ab</sup> | 58.6 $\pm$ 0.5 <sup>b</sup> | 63.5 $\pm$ 0.6 <sup>a</sup> |
| Lateral head displacement (ALH; $\mu\text{m}$ ) | 3.8 $\pm$ 0.1   | 4.0 $\pm$ 0.2   | 3.9 $\pm$ 0.2   | 2.8 $\pm$ 0.05  | 2.7 $\pm$ 0.05  | 2.8 $\pm$ 0.0  | 3.80 $\pm$ 0.2                | 3.5 $\pm$ 0.2               | 3.3 $\pm$ 0.1               |
| Beat cross frequency (BCF; Hz)                  | 23.8 $\pm$ 0.5  | 21.7 $\pm$ 1.3  | 23.0 $\pm$ 1.2  | 22.0 $\pm$ 1.1  | 26.6 $\pm$ 1.1  | 26.3 $\pm$ 0.8 | 21.10 $\pm$ 1.1               | 20.9 $\pm$ 0.8              | 22.4 $\pm$ 0.2              |
| PIAIH <sup>2</sup> (%)                          | 37.7 $\pm$ 0.2  | 33.7 $\pm$ 1.7  | 35.7 $\pm$ 2.7  | 39.2 $\pm$ 2.7  | 38.5 $\pm$ 0.0  | 40.5 $\pm$ 0.5 | 46.75 $\pm$ 5.7               | 49.2 $\pm$ 0.2              | 57.2 $\pm$ 3.7              |
| Plasma membrane integrity (%)                   | 43.0 $\pm$ 3.5  | 34.7 $\pm$ 2.7  | 38.7 $\pm$ 2.2  | 41.2 $\pm$ 4.2  | 40.2 $\pm$ 1.2  | 41.2 $\pm$ 0.7 | 66.25 $\pm$ 5.7               | 54.2 $\pm$ 2.2              | 61.2 $\pm$ 0.7              |
| Acrosome membrane integrity (%)                 | 60.5 $\pm$ 1.5  | 57.7 $\pm$ 1.2  | 57.7 $\pm$ 1.7  | 56.0 $\pm$ 2.5  | 53.5 $\pm$ 4.5  | 51.7 $\pm$ 0.2 | 55.25 $\pm$ 8.2               | 60.5 $\pm$ 3.5              | 66.0 $\pm$ 7.0              |
| High mitochondrial membrane potential (%)       | 41.2 $\pm$ 1.2  | 35.7 $\pm$ 1.7  | 42.0 $\pm$ 2.5  | 49.5 $\pm$ 3.0  | 49.5 $\pm$ 4.5  | 57.2 $\pm$ 3.2 | 68.50 $\pm$ 2.5               | 64.0 $\pm$ 3.0              | 65.7 $\pm$ 1.2              |
| ROS <sup>3</sup> (%)                            | 7.0 $\pm$ 0.0   | 7.5 $\pm$ 4.5   | 8.7 $\pm$ 6.2   | 11.5 $\pm$ 0.5  | 6.0 $\pm$ 5.0   | 4.5 $\pm$ 1.5  | 15.5 $\pm$ 4.5                | 14.5 $\pm$ 1.5              | 20.5 $\pm$ 3.5              |

**Supplementary Table S5.** Mean and SEM of relative levels of the panel of 380 miRNAs detected in bovine gametes: sperm cells from high (HF) and low fertility (LF) bulls and in mature oocytes. SEM: standard error of the mean.

| miRNAs                                                    | Sperm cells |          |          |          | Mature oocytes (n=3) |   |        |
|-----------------------------------------------------------|-------------|----------|----------|----------|----------------------|---|--------|
|                                                           | HF (n=3)    |          | LF (n=3) |          |                      |   |        |
| <i>Detected in both groups (HF and LF) of sperm cells</i> |             |          |          |          |                      |   |        |
| bta-let-7a-3p                                             | 0.0082      | ± 0.0029 | 0.0052   | ± 0.0064 | .                    | ± | .      |
| bta-let-7a-5p                                             | 0.0787      | ± 0.0399 | 0.0820   | ± 0.0179 | 0.0060               | ± | 0.0017 |
| bta-let-7c                                                | 0.0655      | ± 0.0376 | 0.0462   | ± 0.0203 | 0.0056               | ± | 0.0034 |
| bta-let-7d                                                | 0.0275      | ± 0.0122 | 0.0283   | ± 0.0087 | 0.0067               | ± | 0.0018 |
| bta-let-7e                                                | 0.1503      | ± 0.0720 | 0.1566   | ± 0.0185 | 0.0198               | ± | 0.0155 |
| bta-let-7f                                                | 0.0064      | ± 0.0042 | 0.0104   | ± 0.0054 | 0.0021               | ± | 0.0015 |
| bta-let-7g                                                | 0.0245      | ± 0.0080 | 0.0114   | ± 0.0138 | 0.0042               | ± | 0.0022 |
| bta-let-7i                                                | 0.0116      | ± 0.0091 | 0.0065   | ± 0.0037 | 0.0072               | ± | 0.0045 |
| bta-miR-7                                                 | 0.0403      | ± 0.0391 | 0.0234   | ± 0.0192 | 0.0049               | ± | 0.0012 |
| bta-miR-9-5p                                              | 0.0225      | ± 0.0145 | 0.0211   | ± 0.0146 | 0.0100               | ± | 0.0074 |
| bta-miR-10a                                               | 0.3017      | ± 0.1970 | 0.4891   | ± 0.0931 | 0.0454               | ± | 0.0070 |
| bta-miR-10b                                               | 0.0049      | ± 0.0028 | 0.0059   | ± 0.0032 | 0.0429               | ± | 0.0074 |
| bta-miR-15a                                               | 0.7730      | ± 0.7098 | 1.0576   | ± 0.9029 | 0.0422               | ± | 0.0035 |
| bta-miR-15b                                               | 1.5945      | ± 1.5854 | 1.7931   | ± 1.6892 | 0.0134               | ± | 0.0051 |
| bta-miR-16a                                               | 2.2002      | ± 1.8295 | 2.5497   | ± 2.7160 | 0.1019               | ± | 0.0280 |
| bta-miR-16b                                               | 5.3977      | ± 4.7208 | 4.0805   | ± 2.1031 | 0.2727               | ± | 0.2049 |
| bta-miR-17-5p                                             | 0.0725      | ± 0.0696 | 0.0549   | ± 0.0341 | 0.0171               | ± | 0.0024 |
| bta-miR-18a                                               | 0.0863      | ± 0.0674 | 0.0838   | ± 0.0811 | 0.0102               | ± | 0.0044 |
| bta-miR-18b                                               | 0.0289      | ± 0.0261 | 0.0212   | ± 0.0202 | 0.0023               | ± | 0.0016 |
| bta-miR-19a                                               | 0.0286      | ± 0.0337 | 0.0134   | ± 0.0198 | 0.0377               | ± | 0.0034 |
| bta-miR-19b                                               | 0.0349      | ± 0.0414 | 0.0158   | ± 0.0150 | 0.0462               | ± | 0.0296 |
| bta-miR-20a                                               | 0.7040      | ± 0.6306 | 0.4886   | ± 0.3146 | 0.0443               | ± | 0.0072 |
| bta-miR-20b                                               | 0.2230      | ± 0.2159 | 0.2580   | ± 0.1985 | 0.0225               | ± | 0.0039 |
| bta-miR-21-5p                                             | 0.0134      | ± 0.0128 | 0.0133   | ± 0.0020 | 0.0037               | ± | 0.0028 |



|                |                 |                 |                 |
|----------------|-----------------|-----------------|-----------------|
| bta-miR-22-5p  | 0.0018 ± 0.0014 | 0.0026 ± 0.0037 | 0.0120 ± 0.0038 |
| bta-miR-23a    | 0.0625 ± 0.0436 | 0.0895 ± 0.0414 | 0.0119 ± 0.0055 |
| bta-miR-23b-3p | 0.0017 ± 0.0014 | 0.0031 ± 0.0013 | 0.0526 ± 0.0702 |
| bta-miR-24-3p  | 0.0235 ± 0.0144 | 0.0190 ± 0.0238 | 0.0142 ± 0.0032 |
| bta-miR-25     | 0.1769 ± 0.0393 | 0.2059 ± 0.1237 | 0.0092 ± 0.0045 |
| bta-miR-26a    | 0.0563 ± 0.0559 | 0.0460 ± 0.0361 | 0.0848 ± 0.0746 |
| bta-miR-26b    | 0.0032 ± 0.0003 | 0.0032 ± 0.0031 | 0.0060 ± 0.0071 |
| bta-miR-27a-3p | 0.2037 ± 0.2382 | 0.1972 ± 0.2456 | 0.0522 ± 0.0674 |
| bta-miR-27b    | 0.0973 ± 0.0979 | 0.0931 ± 0.0757 | 0.0795 ± 0.0772 |
| bta-miR-28     | 0.0047 ± 0.0014 | 0.0039 ± 0.0017 | . ± .           |
| bta-miR-29a    | 0.1277 ± 0.1156 | 0.1502 ± 0.1266 | . ± .           |
| bta-miR-29b    | 0.0215 ± 0.0137 | 0.0236 ± 0.0292 | 0.0027 ± 0.0023 |
| bta-miR-29c    | 0.1176 ± 0.1196 | 0.1621 ± 0.1269 | 0.0027 ± 0.0008 |
| bta-miR-29d-3p | 0.0157 ± 0.0066 | 0.0176 ± 0.0181 | . ± .           |
| bta-miR-29d-5p | 0.0012 ± 0.0014 | 0.0027 ± 0.0025 | 0.0027 ± 0.0012 |
| bta-miR-29e    | 0.0059 ± 0.0033 | 0.0094 ± 0.0063 | . ± .           |
| bta-miR-30a-5p | 0.0515 ± 0.0559 | 0.0891 ± 0.0726 | 0.0143 ± 0.0075 |
| bta-miR-30b-5p | 0.0627 ± 0.0710 | 0.0600 ± 0.0516 | 0.0468 ± 0.0234 |
| bta-miR-30c    | 0.0508 ± 0.0584 | 0.0414 ± 0.0491 | 0.1560 ± 0.2161 |
| bta-miR-30d    | 0.0606 ± 0.0541 | 0.0517 ± 0.0568 | 0.0136 ± 0.0089 |
| bta-miR-30e-5p | 0.0652 ± 0.0615 | 0.0634 ± 0.0689 | 0.0164 ± 0.0013 |
| bta-miR-30f    | 0.0131 ± 0.0024 | 0.0037 ± 0.0030 | 0.0151 ± 0.0088 |
| bta-miR-33b    | 0.0004 ± 0.0002 | 0.0002 ± 0.0000 | 0.0007 ± 0.0006 |
| bta-miR-34a    | 0.0342 ± 0.0412 | 0.0146 ± 0.0034 | 0.0070 ± 0.0070 |
| bta-miR-34b    | 0.3081 ± 0.3086 | 0.5956 ± 0.6895 | 0.0157 ± 0.0056 |
| bta-miR-34c    | 0.3413 ± 0.3560 | 0.6209 ± 0.7448 | 0.0203 ± 0.0195 |
| bta-miR-92a    | 0.0264 ± 0.0112 | 0.0332 ± 0.0128 | 0.0624 ± 0.0259 |
| bta-miR-92b    | 0.0906 ± 0.0335 | 0.0621 ± 0.0093 | 9.8715 ± 2.7442 |
| bta-miR-93     | 0.6598 ± 0.5074 | 0.8192 ± 0.6432 | 0.0103 ± 0.0007 |
| bta-miR-95     | 0.0026 ± 0.0011 | 0.0041 ± 0.0043 | . ± .           |
| bta-miR-99a-5p | 1.0856 ± 0.7910 | 1.7422 ± 1.0775 | 0.0043 ± 0.0037 |

|                |                   |                  |                   |
|----------------|-------------------|------------------|-------------------|
| bta-miR-99b    | 0.9146 ± 0.3110   | 0.7662 ± 0.2567  | 4.4615 ± 0.8911   |
| bta-miR-99b    | 0.9223 ± 0.2811   | 0.8128 ± 0.2058  | 5.7071 ± 0.4555   |
| bta-miR-100    | 0.9619 ± 0.6599   | 1.2005 ± 0.9492  | 0.0136 ± 0.0020   |
| bta-miR-101    | 0.0882 ± 0.1035   | 0.1185 ± 0.1503  | 0.0057 ± 0.0034   |
| bta-miR-103    | 0.0598 ± 0.0553   | 0.0660 ± 0.0652  | 0.0065 ± 0.0047   |
| bta-miR-105a   | 0.0014 ± 0.0015   | 0.0014 ± 0.0010  | 0.0075 ± 0.0089   |
| bta-miR-105b   | 0.0034 ± 0.0011   | 0.0015 ± 0.0011  | 0.0137 ± 0.0083   |
| bta-miR-106a   | 0.6168 ± 0.6309   | 0.5302 ± 0.4100  | 0.0466 ± 0.0238   |
| bta-miR-106b   | 0.1893 ± 0.1984   | 0.1591 ± 0.1428  | 0.0124 ± 0.0061   |
| bta-miR-122    | 0.0064 ± 0.0040   | 0.0140 ± 0.0030  | 0.0044 ± 0.0033   |
| bta-miR-122    | 0.0079 ± 0.0052   | 0.0121 ± 0.0042  | 0.0036 ± 0.0031   |
| bta-miR-124a   | 0.0002 ± 0.0001   | 0.0009 ± 0.0008  | 0.0065 ± 0.0030   |
| bta-miR-124b   | 0.0009 ± 0.0006   | 0.0003 ± 0.0001  | 0.0073 ± 0.0037   |
| bta-miR-125a   | 0.0045 ± 0.0027   | 0.0079 ± 0.0099  | 0.0117 ± 0.0169   |
| bta-miR-125b   | 0.5888 ± 0.5419   | 0.7015 ± 0.8170  | 0.0044 ± 0.0007   |
| bta-miR-1260b  | 39.7555 ± 33.8572 | 35.3772 ± 7.6421 | 22.6233 ± 17.8693 |
| bta-miR-126-3p | 0.0090 ± 0.0019   | 0.0062 ± 0.0026  | 0.0919 ± 0.1301   |
| bta-miR-126-5p | 0.0103 ± 0.0030   | 0.0063 ± 0.0008  | 0.0869 ± 0.1112   |
| bta-miR-127    | 0.0080 ± 0.0044   | 0.0045 ± 0.0010  | 0.0416 ± 0.0009   |
| bta-miR-128    | 0.0091 ± 0.0079   | 0.0087 ± 0.0104  | 0.0016 ± 0.0011   |
| bta-miR-1281   | 0.0342 ± 0.0186   | 0.0377 ± 0.0167  | 2.7083 ± 0.2929   |
| bta-miR-1287   | 0.0022 ± 0.0012   | 0.0008 ± 0.0005  | 0.0622 ± 0.0610   |
| bta-miR-129    | 0.0025 ± 0.0016   | 0.0040 ± 0.0027  | 0.0253 ± 0.0076   |
| bta-miR-129-5p | 0.0023 ± 0.0010   | 0.0035 ± 0.0029  | 0.0136 ± 0.0014   |
| bta-miR-130a   | 0.0068 ± 0.0050   | 0.0036 ± 0.0009  | 0.0135 ± 0.0029   |
| bta-miR-130b   | 0.0101 ± 0.0027   | 0.0079 ± 0.0030  | 0.0222 ± 0.0077   |
| bta-miR-132    | 0.1163 ± 0.0001   | 0.1441 ± 0.0320  | 0.1328 ± 0.2099   |
| bta-miR-133a   | 0.0012 ± 0.0008   | 0.0013 ± 0.0013  | 0.1335 ± 0.1083   |
| bta-miR-134    | 0.0033 ± 0.0003   | 0.0024 ± 0.0012  | 0.1272 ± 0.2080   |
| bta-miR-135a   | 0.0134 ± 0.0061   | 0.0220 ± 0.0126  | . ± .             |
| bta-miR-135b   | 0.0062 ± 0.0045   | 0.0147 ± 0.0144  | 0.0003 ± 0.0000   |

|                 |                 |                 |        |   |        |
|-----------------|-----------------|-----------------|--------|---|--------|
| bta-miR-136     | 0.0030 ± 0.0029 | 0.0005 ± 0.0000 | .      | ± | .      |
| bta-miR-138     | 0.0119 ± 0.0042 | 0.0090 ± 0.0041 | 0.2403 | ± | 0.2825 |
| bta-miR-139     | 0.0093 ± 0.0071 | 0.0043 ± 0.0031 | 0.0222 | ± | 0.0208 |
| bta-miR-140     | 0.0084 ± 0.0109 | 0.0072 ± 0.0100 | 0.0238 | ± | 0.0370 |
| bta-miR-141     | 0.0048 ± 0.0065 | 0.0065 ± 0.0067 | 0.0392 | ± | 0.0361 |
| bta-miR-143     | 0.0697 ± 0.0383 | 0.0843 ± 0.0201 | 0.0253 | ± | 0.0310 |
| bta-miR-148b    | 0.0292 ± 0.0384 | 0.0332 ± 0.0408 | 0.0658 | ± | 0.0205 |
| bta-miR-149-3p  | 0.5544 ± 0.1471 | 0.5893 ± 0.4360 | 0.3350 | ± | 0.0541 |
| bta-miR-150     | 0.0068 ± 0.0009 | 0.0063 ± 0.0059 | 0.0364 | ± | 0.0450 |
| bta-miR-151-3p  | 0.0404 ± 0.0098 | 0.0342 ± 0.0054 | 0.0288 | ± | 0.0273 |
| bta-miR-151-5p  | 0.2233 ± 0.1935 | 0.3127 ± 0.2565 | 0.0280 | ± | 0.0040 |
| bta-miR-152     | 0.0021 ± 0.0012 | 0.0027 ± 0.0003 | 0.0572 | ± | 0.0963 |
| bta-miR-153     | 0.0075 ± 0.0101 | 0.0091 ± 0.0098 | 0.0094 | ± | 0.0068 |
| bta-miR-154a    | 0.0008 ± 0.0008 | 0.0008 ± 0.0001 | 0.0605 | ± | 0.0887 |
| bta-miR-154b    | 0.0355 ± 0.0122 | 0.0224 ± 0.0081 | 0.2430 | ± | 0.3430 |
| bta-miR-181a    | 0.0010 ± 0.0008 | 0.0026 ± 0.0023 | 0.0006 | ± | 0.0002 |
| bta-miR-181b    | 0.0012 ± 0.0005 | 0.0022 ± 0.0027 | 0.0078 | ± | 0.0023 |
| bta-miR-181d    | 0.0010 ± 0.0010 | 0.0013 ± 0.0015 | 0.0344 | ± | 0.0446 |
| bta-miR-184     | 0.0016 ± 0.0010 | 0.0008 ± 0.0008 | .      | ± | .      |
| bta-miR-185     | 0.0008 ± 0.0004 | 0.0029 ± 0.0031 | 0.0050 | ± | 0.0022 |
| bta-miR-186     | 0.0385 ± 0.0329 | 0.0441 ± 0.0437 | 0.0322 | ± | 0.0373 |
| bta-miR-187     | 0.0095 ± 0.0028 | 0.0061 ± 0.0017 | 0.0954 | ± | 0.0535 |
| bta-miR-188     | 0.0128 ± 0.0056 | 0.0122 ± 0.0043 | 0.0277 | ± | 0.0103 |
| bta-miR-190a    | 0.0010 ± 0.0001 | 0.0014 ± 0.0006 | 0.0080 | ± | 0.0085 |
| bta-miR-190b    | 0.0326 ± 0.0126 | 0.0361 ± 0.0072 | 0.0058 | ± | 0.0023 |
| bta-miR-191     | 0.0526 ± 0.0461 | 0.0566 ± 0.0330 | 0.0654 | ± | 0.0763 |
| bta-miR-192     | 0.0160 ± 0.0122 | 0.0180 ± 0.0156 | 0.0069 | ± | 0.0010 |
| bta-miR-193a-3p | 0.0006 ± 0.0004 | 0.0008 ± 0.0004 | 0.0029 | ± | 0.0002 |
| bta-miR-193a-5p | 0.0027 ± 0.0020 | 0.0026 ± 0.0028 | 0.0102 | ± | 0.0014 |
| bta-miR-193b    | 0.0004 ± 0.0001 | 0.0004 ± 0.0004 | 0.0020 | ± | 0.0020 |
| bta-miR-194     | 0.0202 ± 0.0093 | 0.0463 ± 0.0416 | 0.0073 | ± | 0.0051 |

|                 |                   |                    |                    |
|-----------------|-------------------|--------------------|--------------------|
| bta-miR-196a    | 0.0067 ± 0.0020   | 0.0099 ± 0.0053    | 0.0633 ± 0.0871    |
| bta-miR-196b    | 0.0040 ± 0.0046   | 0.0033 ± 0.0013    | 0.0054 ± 0.0083    |
| bta-miR-199a-3p | 0.0010 ± 0.0003   | 0.0015 ± 0.0010    | . ± .              |
| bta-miR-199c    | 0.0023 ± 0.0006   | 0.0037 ± 0.0022    | 0.0487 ± 0.0740    |
| bta-miR-200a    | 0.0550 ± 0.0092   | 0.0607 ± 0.0690    | . ± .              |
| bta-miR-200b    | 0.2199 ± 0.1115   | 0.3415 ± 0.0697    | 0.0109 ± 0.0144    |
| bta-miR-200c    | 0.0097 ± 0.0051   | 0.0141 ± 0.0025    | 0.0119 ± 0.0172    |
| bta-miR-204     | 0.2858 ± 0.2761   | 0.3263 ± 0.2577    | 0.0809 ± 0.1048    |
| bta-miR-205     | 0.0018 ± 0.0002   | 0.0006 ± 0.0002    | 0.0512 ± 0.0420    |
| bta-miR-206     | 0.0021 ± 0.0016   | 0.0014 ± 0.0008    | 0.0838 ± 0.1251    |
| bta-miR-210     | 0.0135 ± 0.0061   | 0.0119 ± 0.0082    | 0.0353 ± 0.0061    |
| bta-miR-211     | 0.2784 ± 0.2428   | 0.2881 ± 0.2613    | 0.7258 ± 1.1919    |
| bta-miR-214     | 0.0033 ± 0.0005   | 0.0059 ± 0.0020    | 0.0202 ± 0.0012    |
| bta-miR-215     | 0.0084 ± 0.0054   | 0.0107 ± 0.0087    | 0.0050 ± 0.0030    |
| bta-miR-216a    | 0.0017 ± 0.0018   | 0.0047 ± 0.0024    | 0.0256 ± 0.0060    |
| bta-miR-216b    | 0.0100 ± 0.0045   | 0.0166 ± 0.0022    | 0.0016 ± 0.0014    |
| bta-miR-217     | 0.0003 ± 0.0001   | 0.0004 ± 0.0003    | . ± .              |
| bta-miR-219-3p  | 0.0015 ± 0.0014   | 0.0008 ± 0.0004    | 0.0245 ± 0.0300    |
| bta-miR-222     | 0.0009 ± 0.0005   | 0.0009 ± 0.0007    | 0.0355 ± 0.0280    |
| bta-miR-296-3p  | 0.0088 ± 0.0074   | 0.0075 ± 0.0020    | 0.1602 ± 0.1695    |
| bta-miR-296-5p  | 0.0358 ± 0.0255   | 0.0362 ± 0.0210    | 1.4022 ± 1.0605    |
| bta-miR-302c    | 0.0022 ± 0.0017   | 0.0006 ± 0.0002    | 0.0214 ± 0.0358    |
| bta-miR-320a    | 0.0427 ± 0.0173   | 0.0325 ± 0.0064    | 0.0776 ± 0.0262    |
| bta-miR-320b    | 0.0052 ± 0.0015   | 0.0058 ± 0.0015    | 0.0178 ± 0.0134    |
| bta-miR-323     | 133.069 ± 68.9476 | 101.8617 ± 48.3551 | 535.5672 ± 82.9623 |
| bta-miR-324     | 0.0065 ± 0.0045   | 0.0062 ± 0.0026    | 0.0116 ± 0.0124    |
| bta-miR-326     | 0.0124 ± 0.0061   | 0.0154 ± 0.0118    | 0.0669 ± 0.0070    |
| bta-miR-328     | 0.0076 ± 0.0037   | 0.0088 ± 0.0068    | 0.0182 ± 0.0136    |
| bta-miR-330     | 0.0050 ± 0.0053   | 0.0040 ± 0.0030    | 0.0194 ± 0.0080    |
| bta-miR-331-5p  | 0.0026 ± 0.0014   | 0.0020 ± 0.0008    | 0.0272 ± 0.0165    |
| bta-miR-335     | 0.0520 ± 0.0597   | 0.0476 ± 0.0568    | . ± .              |

|                |                 |                 |                 |
|----------------|-----------------|-----------------|-----------------|
| bta-miR-338    | 0.0017 ± 0.0000 | 0.0055 ± 0.0049 | 0.0092 ± 0.0055 |
| bta-miR-339a   | 0.0082 ± 0.0030 | 0.0142 ± 0.0039 | 0.0796 ± 0.0611 |
| bta-miR-339b   | 0.0110 ± 0.0035 | 0.0135 ± 0.0120 | 0.2950 ± 0.3178 |
| bta-miR-345-3p | 0.0021 ± 0.0015 | 0.0024 ± 0.0010 | 0.0209 ± 0.0037 |
| bta-miR-345-5p | 0.0028 ± 0.0017 | 0.0042 ± 0.0020 | 0.0200 ± 0.0108 |
| bta-miR-346    | 0.0240 ± 0.0121 | 0.0217 ± 0.0147 | 0.3168 ± 0.0560 |
| bta-miR-363    | 0.0024 ± 0.0024 | 0.0033 ± 0.0034 | 0.0140 ± 0.0041 |
| bta-miR-365-5p | 0.0034 ± 0.0002 | 0.0057 ± 0.0012 | 0.0174 ± 0.0041 |
| bta-miR-369-3p | 0.0034 ± 0.0024 | 0.0020 ± 0.0014 | . ± .           |
| bta-miR-370    | 0.0033 ± 0.0027 | 0.0031 ± 0.0010 | 0.0255 ± 0.0075 |
| bta-miR-374a   | 0.0017 ± 0.0012 | 0.0021 ± 0.0001 | . ± .           |
| bta-miR-374b   | 0.0022 ± 0.0009 | 0.0041 ± 0.0008 | . ± .           |
| bta-miR-375    | 0.2240 ± 0.0873 | 0.2036 ± 0.0566 | 0.0753 ± 0.1085 |
| bta-miR-378    | 0.0024 ± 0.0022 | 0.0025 ± 0.0014 | 0.1925 ± 0.1854 |
| bta-miR-378b   | 0.0016 ± 0.0008 | 0.0015 ± 0.0009 | 0.1624 ± 0.1365 |
| bta-miR-378d   | 0.0023 ± 0.0025 | 0.0013 ± 0.0003 | 0.2972 ± 0.2940 |
| bta-miR-380-5p | 0.0214 ± 0.0056 | 0.0099 ± 0.0087 | 0.2800 ± 0.2844 |
| bta-miR-381    | 0.0043 ± 0.0031 | 0.0023 ± 0.0028 | 0.0056 ± 0.0016 |
| bta-miR-382    | 0.0304 ± 0.0095 | 0.0207 ± 0.0184 | 0.1174 ± 0.0504 |
| bta-miR-383    | 0.0022 ± 0.0006 | 0.0014 ± 0.0008 | 0.0198 ± 0.0199 |
| bta-miR-409a   | 0.0045 ± 0.0072 | 0.0006 ± 0.0002 | . ± .           |
| bta-miR-410    | 0.0004 ± 0.0001 | 0.0004 ± 0.0001 | 0.0049 ± 0.0044 |
| bta-miR-411a   | 0.0036 ± 0.0018 | 0.0022 ± 0.0017 | 0.0403 ± 0.0310 |
| bta-miR-421    | 0.0070 ± 0.0064 | 0.0067 ± 0.0021 | 0.1600 ± 0.1417 |
| bta-miR-423-3p | 0.0029 ± 0.0023 | 0.0036 ± 0.0030 | 0.0216 ± 0.0044 |
| bta-miR-423-5p | 0.0100 ± 0.0034 | 0.0126 ± 0.0044 | 0.0031 ± 0.0010 |
| bta-miR-425-5p | 1.1448 ± 0.3236 | 1.2706 ± 0.2768 | 0.0051 ± 0.0006 |
| bta-miR-429    | 0.0144 ± 0.0073 | 0.0109 ± 0.0036 | 0.0388 ± 0.0065 |
| bta-miR-431    | 0.0026 ± 0.0014 | 0.0027 ± 0.0019 | 0.0149 ± 0.0038 |
| bta-miR-432    | 0.0029 ± 0.0015 | 0.0008 ± 0.0008 | 0.0796 ± 0.0897 |
| bta-miR-433    | 0.0099 ± 0.0026 | 0.0081 ± 0.0053 | 0.1321 ± 0.0795 |

|                |                   |                  |                   |
|----------------|-------------------|------------------|-------------------|
| bta-miR-449a   | 0.3221 ± 0.3608   | 0.2782 ± 0.3492  | 0.0034 ± 0.0012   |
| bta-miR-449b   | 0.0206 ± 0.0301   | 0.0301 ± 0.0446  | 0.0101 ± 0.0078   |
| bta-miR-449d   | 0.0132 ± 0.0058   | 0.0108 ± 0.0074  | 0.0335 ± 0.0128   |
| bta-miR-452    | 0.0013 ± 0.0012   | 0.0002 ± 0.0000  | 0.0328 ± 0.0395   |
| bta-miR-453    | 0.0069 ± 0.0001   | 0.0039 ± 0.0005  | 0.0046 ± 0.0035   |
| bta-miR-484    | 0.0007 ± 0.0007   | 0.0012 ± 0.0010  | 0.0332 ± 0.0101   |
| bta-miR-485    | 0.0005 ± 0.0002   | 0.0004 ± 0.0004  | 0.0082 ± 0.0103   |
| bta-miR-486    | 0.0694 ± 0.0216   | 0.0555 ± 0.0103  | 0.1009 ± 0.0403   |
| bta-miR-487b   | 0.0012 ± 0.0008   | 0.0006 ± 0.0006  | 0.0027 ± 0.0023   |
| bta-miR-489    | 0.0016 ± 0.0011   | 0.0010 ± 0.0004  | 0.0482 ± 0.0301   |
| bta-miR-490    | 0.0039 ± 0.0007   | 0.0047 ± 0.0028  | 0.0339 ± 0.0150   |
| bta-miR-491    | 0.0012 ± 0.0007   | 0.0029 ± 0.0037  | 0.0221 ± 0.0168   |
| bta-miR-493    | 0.0106 ± 0.0053   | 0.0105 ± 0.0037  | 0.0527 ± 0.0298   |
| bta-miR-494    | 1.3068 ± 0.7157   | 2.2816 ± 1.0446  | 10.5780 ± 3.0809  |
| bta-miR-497    | 0.0097 ± 0.0084   | 0.0113 ± 0.0112  | 0.0055 ± 0.0041   |
| bta-miR-500    | 0.0011 ± 0.0002   | 0.0008 ± 0.0001  | 0.1472 ± 0.0597   |
| bta-miR-503-3p | 0.0199 ± 0.0085   | 0.0115 ± 0.0028  | 0.2895 ± 0.1169   |
| bta-miR-504    | 0.0027 ± 0.0024   | 0.0033 ± 0.0008  | 0.0994 ± 0.0753   |
| bta-miR-505    | 0.0033 ± 0.0001   | 0.0009 ± 0.0003  | 0.0320 ± 0.0253   |
| bta-miR-532    | 0.0139 ± 0.0207   | 0.0002 ± 0.0002  | 0.0095 ± 0.0027   |
| bta-miR-541    | 0.0150 ± 0.0027   | 0.0141 ± 0.0050  | 0.1668 ± 0.0058   |
| bta-miR-542-5p | 0.0110 ± 0.0059   | 0.0034 ± 0.0017  | 0.0005 ± 0.0002   |
| bta-miR-545-5p | 0.0024 ± 0.0012   | 0.0007 ± 0.0003  | . ± .             |
| bta-miR-574    | 0.1758 ± 0.0904   | 0.1467 ± 0.0745  | 1.8761 ± 0.5947   |
| bta-miR-584    | 0.0031 ± 0.0017   | 0.0031 ± 0.0017  | 0.0298 ± 0.0138   |
| bta-miR-631    | 29.1166 ± 16.7781 | 13.9559 ± 3.3240 | 86.5707 ± 17.6398 |
| bta-miR-654    | 0.0025 ± 0.0002   | 0.0026 ± 0.0037  | 0.0218 ± 0.0137   |
| bta-miR-656    | 0.0030 ± 0.0006   | 0.0059 ± 0.0075  | 0.0232 ± 0.0123   |
| bta-miR-658    | 0.0019 ± 0.0018   | 0.0011 ± 0.0007  | 0.0024 ± 0.0009   |
| bta-miR-660    | 0.0076 ± 0.0010   | 0.0089 ± 0.0055  | 0.0347 ± 0.0334   |
| bta-miR-664a   | 0.0113 ± 0.0042   | 0.0186 ± 0.0155  | 0.0312 ± 0.0099   |

|                 |                 |                 |                   |
|-----------------|-----------------|-----------------|-------------------|
| bta-miR-664b    | 0.0277 ± 0.0202 | 0.0274 ± 0.0151 | 0.0520 ± 0.0315   |
| bta-miR-665     | 0.0852 ± 0.0075 | 0.0491 ± 0.0148 | 1.8669 ± 0.5909   |
| bta-miR-669     | 0.0136 ± 0.0064 | 0.0152 ± 0.0086 | 0.2193 ± 0.0717   |
| bta-miR-677     | 0.0036 ± 0.0029 | 0.0011 ± 0.0002 | 0.0120 ± 0.0074   |
| bta-miR-708     | 0.0009 ± 0.0002 | 0.0007 ± 0.0004 | 0.0137 ± 0.0096   |
| bta-miR-744     | 0.0005 ± 0.0001 | 0.0011 ± 0.0007 | 0.0034 ± 0.0011   |
| bta-miR-760-3p  | 0.0084 ± 0.0033 | 0.0064 ± 0.0049 | 0.0605 ± 0.0178   |
| bta-miR-760-5p  | 0.1440 ± 0.1134 | 0.2701 ± 0.2594 | 0.2879 ± 0.0473   |
| bta-miR-761     | 0.0017 ± 0.0005 | 0.0017 ± 0.0015 | 0.0019 ± 0.0020   |
| bta-miR-763     | 0.0047 ± 0.0032 | 0.0170 ± 0.0118 | 0.0537 ± 0.0226   |
| bta-miR-764     | 0.0296 ± 0.0388 | 0.0177 ± 0.0243 | 0.0095 ± 0.0053   |
| bta-miR-767     | 0.0068 ± 0.0045 | 0.0056 ± 0.0016 | 0.0156 ± 0.0003   |
| bta-miR-769     | 0.0010 ± 0.0003 | 0.0007 ± 0.0006 | 0.0265 ± 0.0138   |
| bta-miR-873     | 0.0009 ± 0.0012 | 0.0003 ± 0.0003 | 0.0258 ± 0.0200   |
| bta-miR-877     | 0.0348 ± 0.0057 | 0.0213 ± 0.0024 | 0.1232 ± 0.0367   |
| bta-miR-885     | 0.0025 ± 0.0026 | 0.0031 ± 0.0020 | 0.0446 ± 0.0129   |
| bta-miR-935     | 0.0072 ± 0.0025 | 0.0080 ± 0.0044 | 0.2452 ± 0.0586   |
| bta-miR-940     | 0.9009 ± 0.3382 | 0.7745 ± 0.1527 | 32.4275 ± 12.2599 |
| bta-miR-1224    | 3.2663 ± 1.3077 | 3.1231 ± 0.5453 | 2.3409 ± 0.6572   |
| bta-miR-1246    | 0.9191 ± 0.4005 | 1.2088 ± 0.4008 | 12.6860 ± 4.3288  |
| bta-miR-1247-3p | 0.0213 ± 0.0070 | 0.0135 ± 0.0013 | 0.2544 ± 0.1685   |
| bta-miR-1247-5p | 0.3421 ± 0.1552 | 0.3060 ± 0.1354 | 0.4988 ± 0.2081   |
| bta-miR-1249    | 0.0018 ± 0.0013 | 0.0014 ± 0.0012 | 0.0401 ± 0.0039   |
| bta-miR-1291    | 0.0005 ± 0.0003 | 0.0014 ± 0.0008 | 0.0118 ± 0.0070   |
| bta-miR-1296    | 0.0181 ± 0.0065 | 0.0193 ± 0.0015 | . ± .             |
| bta-miR-1306    | 0.0258 ± 0.0200 | 0.0246 ± 0.0120 | 0.3889 ± 0.3027   |
| bta-miR-1307    | 0.0654 ± 0.0223 | 0.1022 ± 0.0375 | 0.7877 ± 0.2135   |
| bta-miR-1343-3p | 0.0224 ± 0.0115 | 0.0252 ± 0.0090 | 0.3794 ± 0.0953   |
| bta-miR-1343-5p | 1.2755 ± 0.6539 | 0.9952 ± 0.1259 | 0.4247 ± 0.1212   |
| bta-miR-1388-3p | 0.0090 ± 0.0056 | 0.0060 ± 0.0019 | 0.1593 ± 0.0131   |
| bta-miR-4523    | 0.0113 ± 0.0053 | 0.0088 ± 0.0035 | 0.0115 ± 0.0047   |

|                 |                 |                 |                   |
|-----------------|-----------------|-----------------|-------------------|
| Hm/Ms/RtT1snRNA | 0.9175 ± 0.2472 | 1.6149 ± 0.5084 | 53.6440 ± 17.0054 |
| RNT43 snoRNA    | 0.0041 ± 0.0025 | 0.0045 ± 0.0006 | 0.1462 ± 0.0139   |

***Exclusively detected in HF group of sperm cells***

|                 |                 |       |                  |
|-----------------|-----------------|-------|------------------|
| bta-miR-27a-5p  | 0.0010 ± 0.0005 | . ± . | 0.0035 ± 0.0021  |
| bta-miR-31      | 0.0022 ± 0.0003 | . ± . | 0.0146 ± 0.0072  |
| bta-miR-32      | 0.0006 ± 0.0005 | . ± . | . ± .            |
| bta-miR-133b    | 0.0004 ± 0.0003 | . ± . | 0.0074 ± 0.0071  |
| bta-miR-142-5p  | 0.0009 ± 0.0009 | . ± . | . ± .            |
| bta-miR-145     | 0.0008 ± 0.0001 | . ± . | 0.1698 ± 0.1044  |
| bta-miR-146a    | 0.0142 ± 0.0129 | . ± . | 0.0051 ± 0.0037  |
| bta-miR-147     | 0.0028 ± 0.0011 | . ± . | 0.0008 ± 0.0009  |
| bta-miR-149-5p  | 0.0011 ± 0.0008 | . ± . | 1.5298 ± 1.5311  |
| bta-miR-154c    | 0.0012 ± 0.0005 | . ± . | 0.0114 ± 0.0187  |
| bta-miR-212     | 0.0017 ± 0.0000 | . ± . | 0.0071 ± 0.0088  |
| bta-miR-219     | 0.0027 ± 0.0011 | . ± . | 0.0703 ± 0.0348  |
| bta-miR-301b    | 0.0002 ± 0.0002 | . ± . | . ± .            |
| bta-miR-302b    | 0.0007 ± 0.0004 | . ± . | . ± .            |
| bta-miR-331-3p  | 0.0009 ± 0.0001 | . ± . | . ± .            |
| bta-miR-380-3p  | 0.0013 ± 0.0001 | . ± . | 0.0206 ± 0.0159  |
| bta-miR-411b    | 0.0003 ± 0.0002 | . ± . | 0.0041 ± 0.0028  |
| bta-miR-425-3p  | 0.0827 ± 0.0364 | . ± . | 14.1388 ± 5.8179 |
| bta-miR-495     | 0.0022 ± 0.0009 | . ± . | . ± .            |
| bta-miR-502b    | 0.0023 ± 0.0001 | . ± . | 0.0378 ± 0.0310  |
| bta-miR-545-3p  | 0.0012 ± 0.0004 | . ± . | . ± .            |
| bta-miR-655     | 0.0004 ± 0.0003 | . ± . | 0.0054 ± 0.0044  |
| bta-miR-874     | 0.0227 ± 0.0104 | . ± . | 0.0836 ± 0.0124  |
| bta-miR-1225-3p | 0.3219 ± 0.1637 | . ± . | 26.8475 ± 0.9828 |

***Exclusively detected in LF group of sperm cells***

|               |       |                 |                 |
|---------------|-------|-----------------|-----------------|
| bta-let-7b    | . ± . | 0.0878 ± 0.1248 | 0.0021 ± 0.0016 |
| bta-miR-17-3p | . ± . | 0.0016 ± 0.0012 | 0.0060 ± 0.0038 |
| bta-miR-21-3p | . ± . | 0.0001 ± 0.0000 | 0.0051 ± 0.0020 |



|                |   |   |   |        |   |        |        |   |        |
|----------------|---|---|---|--------|---|--------|--------|---|--------|
| bta-miR-107    | . | ± | . | 0.0006 | ± | 0.0001 | 0.1329 | ± | 0.1836 |
| bta-miR-129-3p | . | ± | . | 0.0005 | ± | 0.0002 | 0.0038 | ± | 0.0020 |
| bta-miR-137    | . | ± | . | 0.0027 | ± | 0.0015 | 0.0011 | ± | 0.0002 |
| bta-miR-146b   | . | ± | . | 0.0066 | ± | 0.0039 | 0.0080 | ± | 0.0064 |
| bta-miR-148a   | . | ± | . | 0.0271 | ± | 0.0317 | 0.1130 | ± | 0.0373 |
| bta-miR-181c   | . | ± | . | 0.0017 | ± | 0.0006 | .      | ± | .      |
| bta-miR-195    | . | ± | . | 0.7969 | ± | 0.7520 | 0.0367 | ± | 0.0193 |
| bta-miR-301a   | . | ± | . | 0.0003 | ± | 0.0003 | .      | ± | .      |
| bta-miR-302a   | . | ± | . | 0.0017 | ± | 0.0020 | .      | ± | .      |
| bta-miR-361    | . | ± | . | 0.0002 | ± | 0.0001 | 0.0065 | ± | 0.0043 |
| bta-miR-362-3p | . | ± | . | 0.0013 | ± | 0.0012 | 0.0144 | ± | 0.0157 |
| bta-miR-362-5p | . | ± | . | 0.0003 | ± | 0.0003 | 0.0025 | ± | 0.0010 |
| bta-miR-371    | . | ± | . | 0.0005 | ± | 0.0005 | 0.0018 | ± | 0.0013 |
| bta-miR-376a   | . | ± | . | 0.0003 | ± | 0.0001 | .      | ± | .      |
| bta-miR-377    | . | ± | . | 0.0010 | ± | 0.0006 | 0.0007 | ± | 0.0005 |
| bta-miR-378c   | . | ± | . | 0.0013 | ± | 0.0009 | 0.0020 | ± | 0.0020 |
| bta-miR-379    | . | ± | . | 0.0007 | ± | 0.0004 | 0.0023 | ± | 0.0011 |
| bta-miR-424-3p | . | ± | . | 0.0007 | ± | 0.0003 | 0.0135 | ± | 0.0046 |
| bta-miR-424-5p | . | ± | . | 0.0010 | ± | 0.0012 | 0.0239 | ± | 0.0151 |
| bta-miR-448    | . | ± | . | 0.0001 | ± | 0.0000 | 0.0028 | ± | 0.0008 |
| bta-miR-455-5p | . | ± | . | 0.0011 | ± | 0.0013 | 0.0716 | ± | 0.0709 |
| bta-miR-483    | . | ± | . | 0.0010 | ± | 0.0008 | 0.0061 | ± | 0.0033 |
| bta-miR-488    | . | ± | . | 0.0008 | ± | 0.0004 | 0.1997 | ± | 0.1782 |
| bta-miR-499    | . | ± | . | 0.0007 | ± | 0.0005 | .      | ± | .      |
| bta-miR-502a   | . | ± | . | 0.0005 | ± | 0.0003 | 0.0033 | ± | 0.0031 |
| bta-miR-503-5p | . | ± | . | 0.0004 | ± | 0.0002 | 0.0414 | ± | 0.0183 |
| bta-miR-543    | . | ± | . | 0.0021 | ± | 0.0001 | 0.0046 | ± | 0.0038 |
| bta-miR-670    | . | ± | . | 0.0012 | ± | 0.0006 | .      | ± | .      |
| bta-miR-671    | . | ± | . | 0.0005 | ± | 0.0000 | 0.0005 | ± | 0.0002 |

*Not detected in either group (HF and LF) of sperm cells*

|           |   |   |   |   |   |   |   |   |   |
|-----------|---|---|---|---|---|---|---|---|---|
| bta-miR-1 | . | ± | . | . | ± | . | . | ± | . |
|-----------|---|---|---|---|---|---|---|---|---|

|                 |   |   |   |   |   |   |        |   |        |
|-----------------|---|---|---|---|---|---|--------|---|--------|
| bta-miR-9-3p    | . | ± | . | . | ± | . | .      | ± | .      |
| bta-miR-22-3p   | . | ± | . | . | ± | . | .      | ± | .      |
| bta-miR-23b-5p  | . | ± | . | . | ± | . | 0.0016 | ± | 0.0009 |
| bta-miR-24      | . | ± | . | . | ± | . | .      | ± | .      |
| bta-miR-26c     | . | ± | . | . | ± | . | .      | ± | .      |
| bta-miR-30b-3p  | . | ± | . | . | ± | . | .      | ± | .      |
| bta-miR-33a     | . | ± | . | . | ± | . | 0.0021 | ± | 0.0002 |
| bta-miR-96      | . | ± | . | . | ± | . | .      | ± | .      |
| bta-miR-98      | . | ± | . | . | ± | . | .      | ± | .      |
| bta-miR-99a-3p  | . | ± | . | . | ± | . | 0.0049 | ± | 0.0021 |
| bta-miR-133c    | . | ± | . | . | ± | . | 0.0857 | ± | 0.1468 |
| bta-miR-142-3p  | . | ± | . | . | ± | . | .      | ± | .      |
| bta-miR-144     | . | ± | . | . | ± | . | .      | ± | .      |
| bta-miR-155     | . | ± | . | . | ± | . | 0.0170 | ± | 0.0238 |
| bta-miR-182     | . | ± | . | . | ± | . | 0.0238 | ± | 0.0328 |
| bta-miR-183     | . | ± | . | . | ± | . | 0.0519 | ± | 0.0370 |
| bta-miR-193a    | . | ± | . | . | ± | . | 0.0006 | ± | 0.0004 |
| bta-miR-197     | . | ± | . | . | ± | . | 0.4294 | ± | 0.5134 |
| bta-miR-199a-5p | . | ± | . | . | ± | . | 0.0009 | ± | 0.0007 |
| bta-miR-199b    | . | ± | . | . | ± | . | 0.0319 | ± | 0.0304 |
| bta-miR-202     | . | ± | . | . | ± | . | 0.0033 | ± | 0.0014 |
| bta-miR-208a    | . | ± | . | . | ± | . | .      | ± | .      |
| bta-miR-208b    | . | ± | . | . | ± | . | .      | ± | .      |
| bta-miR-219-5p  | . | ± | . | . | ± | . | .      | ± | .      |
| bta-miR-221     | . | ± | . | . | ± | . | 0.0199 | ± | 0.0074 |
| bta-miR-223     | . | ± | . | . | ± | . | 0.0089 | ± | 0.0064 |
| bta-miR-224     | . | ± | . | . | ± | . | .      | ± | .      |
| bta-miR-299     | . | ± | . | . | ± | . | .      | ± | .      |
| bta-miR-302d    | . | ± | . | . | ± | . | 0.0025 | ± | 0.0006 |
| bta-miR-329a    | . | ± | . | . | ± | . | .      | ± | .      |
| bta-miR-329b    | . | ± | . | . | ± | . | .      | ± | .      |

|                 |   |   |   |   |   |   |        |   |        |
|-----------------|---|---|---|---|---|---|--------|---|--------|
| bta-miR-340     | . | ± | . | . | ± | . | 0.1876 | ± | 0.2809 |
| bta-miR-342     | . | ± | . | . | ± | . | 0.0220 | ± | 0.0215 |
| bta-miR-365-3p  | . | ± | . | . | ± | . | .      | ± | .      |
| bta-miR-367     | . | ± | . | . | ± | . | .      | ± | .      |
| bta-miR-369-5p  | . | ± | . | . | ± | . | 0.0388 | ± | 0.0515 |
| bta-miR-376b    | . | ± | . | . | ± | . | .      | ± | .      |
| bta-miR-376c    | . | ± | . | . | ± | . | .      | ± | .      |
| bta-miR-376d    | . | ± | . | . | ± | . | .      | ± | .      |
| bta-miR-376e    | . | ± | . | . | ± | . | .      | ± | .      |
| bta-miR-409b    | . | ± | . | . | ± | . | 0.0360 | ± | 0.0278 |
| bta-miR-411c-3p | . | ± | . | . | ± | . | .      | ± | .      |
| bta-miR-411c-5p | . | ± | . | . | ± | . | .      | ± | .      |
| bta-miR-412     | . | ± | . | . | ± | . | 0.0023 | ± | 0.0015 |
| bta-miR-449c    | . | ± | . | . | ± | . | 0.0181 | ± | 0.0242 |
| bta-miR-450a    | . | ± | . | . | ± | . | .      | ± | .      |
| bta-miR-450b    | . | ± | . | . | ± | . | .      | ± | .      |
| bta-miR-451     | . | ± | . | . | ± | . | .      | ± | .      |
| bta-miR-454     | . | ± | . | . | ± | . | 0.0457 | ± | 0.0539 |
| bta-miR-455-3p  | . | ± | . | . | ± | . | 0.0085 | ± | 0.0061 |
| bta-miR-487a    | . | ± | . | . | ± | . | 0.0021 | ± | 0.0008 |
| bta-miR-496     | . | ± | . | . | ± | . | 0.0978 | ± | 0.0761 |
| bta-miR-539     | . | ± | . | . | ± | . | 0.0014 | ± | 0.0016 |
| bta-miR-544a    | . | ± | . | . | ± | . | 0.0100 | ± | 0.0129 |
| bta-miR-544b    | . | ± | . | . | ± | . | 0.0132 | ± | 0.0056 |
| bta-miR-551a    | . | ± | . | . | ± | . | 0.0043 | ± | 0.0038 |
| bta-miR-551b    | . | ± | . | . | ± | . | .      | ± | .      |
| bta-miR-562     | . | ± | . | . | ± | . | 0.0042 | ± | 0.0010 |
| bta-miR-568     | . | ± | . | . | ± | . | 0.0020 | ± | 0.0017 |
| bta-miR-582     | . | ± | . | . | ± | . | 0.1427 | ± | 0.0503 |
| bta-miR-592     | . | ± | . | . | ± | . | 0.0020 | ± | 0.0002 |
| bta-miR-599     | . | ± | . | . | ± | . | .      | ± | .      |

|              |   |   |   |   |   |   |            |   |           |
|--------------|---|---|---|---|---|---|------------|---|-----------|
| bta-miR-615  | . | ± | . | . | ± | . | 40790.7953 | ± | 2884.1670 |
| bta-miR-628  | . | ± | . | . | ± | . | 0.0363     | ± | 0.0567    |
| bta-miR-652  | . | ± | . | . | ± | . | 0.0110     | ± | 0.0048    |
| bta-miR-653  | . | ± | . | . | ± | . | .          | ± | .         |
| bta-miR-758  | . | ± | . | . | ± | . | 0.1031     | ± | 0.0769    |
| bta-miR-759  | . | ± | . | . | ± | . | .          | ± | .         |
| bta-miR-875  | . | ± | . | . | ± | . | 0.0028     | ± | 0.0014    |
| bta-miR-876  | . | ± | . | . | ± | . | 0.4186     | ± | 0.3493    |
| bta-miR-1179 | . | ± | . | . | ± | . | 0.0090     | ± | 0.0124    |
| bta-miR-1185 | . | ± | . | . | ± | . | .          | ± | .         |
| bta-miR-1193 | . | ± | . | . | ± | . | 0.0185     | ± | 0.0213    |
| bta-miR-1197 | . | ± | . | . | ± | . | .          | ± | .         |
| bta-miR-1248 | . | ± | . | . | ± | . | 0.0205     | ± | 0.0186    |
| bta-miR-1271 | . | ± | . | . | ± | . | .          | ± | .         |
| bta-miR-1277 | . | ± | . | . | ± | . | .          | ± | .         |
| bta-miR-1282 | . | ± | . | . | ± | . | 0.0031     | ± | 0.0026    |
| bta-miR-1284 | . | ± | . | . | ± | . | 0.0202     | ± | 0.0191    |
| bta-miR-1298 | . | ± | . | . | ± | . | 0.0032     | ± | 0.0022    |
| bta-miR-1301 | . | ± | . | . | ± | . | 0.0099     | ± | 0.0094    |
| bta-miR-3064 | . | ± | . | . | ± | . | 0.0025     | ± | 0.0006    |

---

**Supplementary Table S6.** Mean and SEM of relative levels of the nine miRNAs investigated in zygotes from high fertility (HF), low fertility (LF) and parthenogenesis (PA) groups as well as mature oocytes (OO). <sup>1</sup>High fertility; <sup>2</sup>Low fertility; <sup>3</sup>Parthenogenetic; <sup>4</sup>Mature oocytes. SEM: standard error of the mean.

| Zygotes        | HF <sup>1</sup> (n=9)      | LF <sup>2</sup> (n=9)      | PA <sup>3</sup> (n=9)      | OO <sup>4</sup> (n=3)      |
|----------------|----------------------------|----------------------------|----------------------------|----------------------------|
| bta-miR-33b    | 0.001±0.0001               | 0.002±0.0009               | 0.001±0.0002               | 0.001±0.0004               |
| bta-miR-126-5p | 0.0008±0.0001              | 0.002±0.001                | 0.001±0.0006               | 0.0004±0.0001              |
| bta-miR-205    | 0.027±0.007                | 0.06±0.03                  | 0.02±0.003                 | 0.02±0.01                  |
| bta-miR-216b   | 0.0006±0.0001 <sup>b</sup> | 0.002±0.00003 <sup>a</sup> | 0.001±0.0003 <sup>ab</sup> | 0.0006±0.0003 <sup>b</sup> |
| bta-miR-339a   | 0.020±0.002                | 0.01±0.002                 | 0.01±0.003                 | 0.01±0.003                 |
| bta-miR-500    | 0.001±0.0004               | 0.005±0.005                | 0.0007±0.0001              | 0.001±0.0005               |
| bta-miR-505    | 0.013±0.002                | 0.02±0.01                  | 0.01±0.001                 | 0.01±0.003                 |
| bta-miR-532    | 0.001±0.0004               | 0.006±0.005                | 0.002±0.0006               | 0.0009±0.0002              |
| bta-miR-542-5p | 0.0009±0.0003              | 0.006±0.006                | 0.0005±0.0002              | 0.0006±0.0003              |

**Supplementary Table S7.** Mean and SEM of relative levels of the nine miRNAs investigated in two-cell embryos from high fertility (HF), low fertility (LF) and parthenogenesis (PA) groups as well as mature oocytes (OO). <sup>1</sup>High fertility; <sup>2</sup>Low fertility; <sup>3</sup>Parthenogenetic; <sup>4</sup>Mature oocytes. SEM: standard error of the mean.

| Two-cell embryos | HF <sup>1</sup> (n=9)  | LF <sup>2</sup> (n=9)  | PA <sup>3</sup> (n=9)   | OO <sup>4</sup> (n=3)      |
|------------------|------------------------|------------------------|-------------------------|----------------------------|
| bta-miR-33b      | 0.001±0.0003           | 0.002±0.0005           | 0.001±0.0004            | 0.001±0.0004               |
| bta-miR-126-5p   | 0.05±0.02 <sup>a</sup> | 0.07±0.04 <sup>a</sup> | 0.02±0.01 <sup>a</sup>  | 0.004±0.0001 <sup>b</sup>  |
| bta-miR-205      | 0.04±0.01              | 0.05±0.01              | 0.05±0.01               | 0.02±0.01                  |
| bta-miR-216b     | 0.002±0.0005           | 0.001±0.0002           | 0.001±0.0005            | 0.0006±0.0003              |
| bta-miR-339a     | 0.12±0.02 <sup>a</sup> | 0.12±0.03 <sup>a</sup> | 0.08±0.01 <sup>a</sup>  | 0.01±0.003 <sup>b</sup>    |
| bta-miR-500      | 0.13±0.06              | 0.10±0.05              | 0.15±0.08               | 0.001±0.0005               |
| bta-miR-505      | 0.05±0.01              | 0.06±0.02              | 0.05±0.01               | 0.01±0.003                 |
| bta-miR-532      | 0.02±0.01 <sup>a</sup> | 0.02±0.01 <sup>a</sup> | 0.01±0.007 <sup>a</sup> | 0.0009±0.0002 <sup>b</sup> |
| bta-miR-542-5p   | 0.002±0.0005           | 0.003±0.0006           | 0.001±0.0005            | 0.0006±0.0003              |

**Supplementary Table S8.** Pre-implantation development rates of bovine embryos produced *in vitro* with IVF of 8 hours for kinetics evaluation.

Two-cell (evaluated 28 to 30 hpi) and four-cell (evaluated 40 to 42 hpi) rates were evaluated in embryos produced *in vitro* using high and low

fertility semen samples. <sup>\*a,b</sup> Different letters on the same column indicate tendency to statistical difference (P=0.07) between groups.

<sup>1</sup>High fertility; <sup>2</sup>Low fertility. Hpi: hours post insemination. Mean and SEM are presented as percentages. SEM: standard error of the mean.

| Fertility Groups | Two-cell embryos |     |                        | Four-cell embryos |     |          |
|------------------|------------------|-----|------------------------|-------------------|-----|----------|
|                  | Oocytes          | N   | Mean±SEM               | Oocytes           | N   | Mean±SEM |
| HF <sup>1</sup>  | 328              | 115 | 35.1±6.8* <sup>a</sup> | 489               | 124 | 25.4±4.2 |
| LF <sup>2</sup>  | 365              | 104 | 28.5±6.7* <sup>b</sup> | 482               | 129 | 26.8±3.2 |

**Supplementary Table S9.** Classification of morphologically abnormal spermatozoa with regard to major and minor defects adapted from Blom <sup>46</sup>.

| <b>Major Defects</b>                                                          | <b>Minor Defects</b>                      |
|-------------------------------------------------------------------------------|-------------------------------------------|
| Acrosome defects                                                              | Head defects:                             |
| Proximal Droplet                                                              | Narrow                                    |
| Head defects:                                                                 | Giant, short, broad, and small normal     |
| Underdeveloped                                                                | Free normal                               |
| Tail curled in the head                                                       | Abaxial, Retroaxial, Oblique implantation |
| Free pathological heads                                                       | Simple bent tail                          |
| Narrow at base                                                                | Distal droplet                            |
| Pear-shaped defect                                                            |                                           |
| Small abnormal heads                                                          |                                           |
| Abnormal contour                                                              |                                           |
| Pouch formation                                                               |                                           |
| Double forms                                                                  |                                           |
| Midpiece defects:                                                             |                                           |
| Corkscrew defect, Pseudodroplet, Tail stump, Broken neck, Swelling and others |                                           |
| Tail defects:                                                                 |                                           |
| Strongly coiled or folded tail                                                |                                           |
| Coiled with distal droplet attached                                           |                                           |



**Supplementary Table S10.** Set up for bovine sperm kinetic evaluation on Sperm Class Analyzer (Microptic, Barcelona, Spain).

| <b>Characteristic</b> | <b>Adjusted to</b>                       |
|-----------------------|------------------------------------------|
| Particle area         | 15 to 70 $\mu\text{m}^2$                 |
| Fast sperm            | VAP (path velocity) > 40 $\mu\text{m/s}$ |
| Progressive motility  | STR (straightness) > 70%                 |
| Circular movement     | LIN (linearity) < 50%                    |
| VAP points            | 5                                        |
| Number of images      | 30                                       |
| Images per second     | 50                                       |

**Supplementary Table S11.** Panel of 380 miRNAs investigated by qPCR in sperm cells.

| #  | miRNA         | #  | miRNA          | #   | miRNA          | #   | miRNA          | #   | miRNA          |
|----|---------------|----|----------------|-----|----------------|-----|----------------|-----|----------------|
| 1  | bta-let-7a-3p | 77 | bta-miR-142-5p | 153 | bta-miR-216a   | 229 | bta-miR-361    | 305 | bta-miR-496    |
| 2  | bta-let-7a-5p | 78 | bta-miR-143    | 154 | bta-miR-216b   | 230 | bta-miR-362-3p | 306 | bta-miR-497    |
| 3  | bta-let-7b    | 79 | bta-miR-144    | 155 | bta-miR-217    | 231 | bta-miR-362-5p | 307 | bta-miR-499    |
| 4  | bta-let-7c    | 80 | bta-miR-145    | 156 | bta-miR-218    | 232 | bta-miR-363    | 308 | bta-miR-500    |
| 5  | bta-let-7d    | 81 | bta-miR-146a   | 157 | bta-miR-219    | 233 | bta-miR-365-3p | 309 | bta-miR-502a   |
| 6  | bta-let-7e    | 82 | bta-miR-146b   | 158 | bta-miR-219-3p | 234 | bta-miR-365-5p | 310 | bta-miR-502b   |
| 7  | bta-let-7f    | 83 | bta-miR-147    | 159 | bta-miR-219-5p | 235 | bta-miR-367    | 311 | bta-miR-503-3p |
| 8  | bta-let-7g    | 84 | bta-miR-148a   | 160 | bta-miR-221    | 236 | bta-miR-369-3p | 312 | bta-miR-503-5p |
| 9  | bta-let-7i    | 85 | bta-miR-148b   | 161 | bta-miR-222    | 237 | bta-miR-369-5p | 313 | bta-miR-504    |
| 10 | bta-miR-1     | 86 | bta-miR-149-3p | 162 | bta-miR-223    | 238 | bta-miR-370    | 314 | bta-miR-505    |
| 11 | bta-miR-100   | 87 | bta-miR-149-5p | 163 | bta-miR-22-3p  | 239 | bta-miR-371    | 315 | bta-miR-532    |
| 12 | bta-miR-101   | 88 | bta-miR-150    | 164 | bta-miR-224    | 240 | bta-miR-374a   | 316 | bta-miR-539    |
| 13 | bta-miR-103   | 89 | bta-miR-151-3p | 165 | bta-miR-22-5p  | 241 | bta-miR-374b   | 317 | bta-miR-541    |
| 14 | bta-miR-105a  | 90 | bta-miR-151-5p | 166 | bta-miR-23a    | 242 | bta-miR-375    | 318 | bta-miR-542-5p |
| 15 | bta-miR-105b  | 91 | bta-miR-152    | 167 | bta-miR-23b-3p | 243 | bta-miR-376a   | 319 | bta-miR-543    |
| 16 | bta-miR-106a  | 92 | bta-miR-153    | 168 | bta-miR-23b-5p | 244 | bta-miR-376b   | 320 | bta-miR-544a   |
| 17 | bta-miR-106b  | 93 | bta-miR-154a   | 169 | bta-miR-24     | 245 | bta-miR-376c   | 321 | bta-miR-544b   |

|    |                 |     |               |     |                |     |                 |     |                |
|----|-----------------|-----|---------------|-----|----------------|-----|-----------------|-----|----------------|
| 18 | bta-miR-107     | 94  | bta-miR-154b  | 170 | bta-miR-24-3p  | 246 | bta-miR-376d    | 322 | bta-miR-545-3p |
| 19 | bta-miR-10a     | 95  | bta-miR-154c  | 171 | bta-miR-25     | 247 | bta-miR-376e    | 323 | bta-miR-545-5p |
| 20 | bta-miR-10b     | 96  | bta-miR-155   | 172 | bta-miR-26a    | 248 | bta-miR-377     | 324 | bta-miR-551a   |
| 21 | bta-miR-1179    | 97  | bta-miR-15a   | 173 | bta-miR-26b    | 249 | bta-miR-378     | 325 | bta-miR-551b   |
| 22 | bta-miR-1185    | 98  | bta-miR-15b   | 174 | bta-miR-26c    | 250 | bta-miR-378b    | 326 | bta-miR-562    |
| 23 | bta-miR-1193    | 99  | bta-miR-16a   | 175 | bta-miR-27a-3p | 251 | bta-miR-378c    | 327 | bta-miR-568    |
| 24 | bta-miR-1197    | 100 | bta-miR-16b   | 176 | bta-miR-27a-5p | 252 | bta-miR-378d    | 328 | bta-miR-574    |
| 25 | bta-miR-122     | 101 | bta-miR-17-3p | 177 | bta-miR-27b    | 253 | bta-miR-379     | 329 | bta-miR-582    |
| 26 | bta-miR-122     | 102 | bta-miR-17-5p | 178 | bta-miR-28     | 254 | bta-miR-380-3p  | 330 | bta-miR-584    |
| 27 | bta-miR-1224    | 103 | bta-miR-181a  | 179 | bta-miR-296-3p | 255 | bta-miR-380-5p  | 331 | bta-miR-592    |
| 28 | bta-miR-1225-3p | 104 | bta-miR-181b  | 180 | bta-miR-296-5p | 256 | bta-miR-381     | 332 | bta-miR-599    |
| 29 | bta-miR-1246    | 105 | bta-miR-181c  | 181 | bta-miR-299    | 257 | bta-miR-382     | 333 | bta-miR-615    |
| 30 | bta-miR-1247-3p | 106 | bta-miR-181d  | 182 | bta-miR-29a    | 258 | bta-miR-383     | 334 | bta-miR-628    |
| 31 | bta-miR-1247-5p | 107 | bta-miR-182   | 183 | bta-miR-29b    | 259 | bta-miR-409a    | 335 | bta-miR-631    |
| 32 | bta-miR-1248    | 108 | bta-miR-183   | 184 | bta-miR-29c    | 260 | bta-miR-409b    | 336 | bta-miR-652    |
| 33 | bta-miR-1249    | 109 | bta-miR-184   | 185 | bta-miR-29d-3p | 261 | bta-miR-410     | 337 | bta-miR-653    |
| 34 | bta-miR-124a    | 110 | bta-miR-185   | 186 | bta-miR-29d-5p | 262 | bta-miR-411a    | 338 | bta-miR-654    |
| 35 | bta-miR-124b    | 111 | bta-miR-186   | 187 | bta-miR-29e    | 263 | bta-miR-411b    | 339 | bta-miR-655    |
| 36 | bta-miR-125a    | 112 | bta-miR-187   | 188 | bta-miR-301a   | 264 | bta-miR-411c-3p | 340 | bta-miR-656    |

|    |                |     |                 |     |                |     |                 |     |                |
|----|----------------|-----|-----------------|-----|----------------|-----|-----------------|-----|----------------|
| 37 | bta-miR-125b   | 113 | bta-miR-188     | 189 | bta-miR-301b   | 265 | bta-miR-411c-5p | 341 | bta-miR-658    |
| 38 | bta-miR-1260b  | 114 | bta-miR-18a     | 190 | bta-miR-302a   | 266 | bta-miR-412     | 342 | bta-miR-660    |
| 39 | bta-miR-126-3p | 115 | bta-miR-18b     | 191 | bta-miR-302b   | 267 | bta-miR-421     | 343 | bta-miR-664a   |
| 40 | bta-miR-126-5p | 116 | bta-miR-190a    | 192 | bta-miR-302c   | 268 | bta-miR-423-3p  | 344 | bta-miR-664b   |
| 41 | bta-miR-127    | 117 | bta-miR-190b    | 193 | bta-miR-302d   | 269 | bta-miR-423-5p  | 345 | bta-miR-665    |
| 42 | bta-miR-1271   | 118 | bta-miR-191     | 194 | bta-miR-3064   | 270 | bta-miR-424-3p  | 346 | bta-miR-669    |
| 43 | bta-miR-1277   | 119 | bta-miR-192     | 195 | bta-miR-30a-5p | 271 | bta-miR-424-5p  | 347 | bta-miR-670    |
| 44 | bta-miR-128    | 120 | bta-miR-193a    | 196 | bta-miR-30b-3p | 272 | bta-miR-425-3p  | 348 | bta-miR-671    |
| 45 | bta-miR-1281   | 121 | bta-miR-193a-3p | 197 | bta-miR-30b-5p | 273 | bta-miR-425-5p  | 349 | bta-miR-677    |
| 46 | bta-miR-1282   | 122 | bta-miR-193a-5p | 198 | bta-miR-30c    | 274 | bta-miR-429     | 350 | bta-miR-7      |
| 47 | bta-miR-1284   | 123 | bta-miR-193b    | 199 | bta-miR-30d    | 275 | bta-miR-431     | 351 | bta-miR-708    |
| 48 | bta-miR-1287   | 124 | bta-miR-194     | 200 | bta-miR-30e-5p | 276 | bta-miR-432     | 352 | bta-miR-744    |
| 49 | bta-miR-129    | 125 | bta-miR-195     | 201 | bta-miR-30f    | 277 | bta-miR-433     | 353 | bta-miR-758    |
| 50 | bta-miR-1291   | 126 | bta-miR-196a    | 202 | bta-miR-31     | 278 | bta-miR-448     | 354 | bta-miR-759    |
| 51 | bta-miR-129-3p | 127 | bta-miR-196b    | 203 | bta-miR-32     | 279 | bta-miR-449a    | 355 | bta-miR-760-3p |
| 52 | bta-miR-129-5p | 128 | bta-miR-197     | 204 | bta-miR-320a   | 280 | bta-miR-449b    | 356 | bta-miR-760-5p |
| 53 | bta-miR-1296   | 129 | bta-miR-199a-3p | 205 | bta-miR-320b   | 281 | bta-miR-449c    | 357 | bta-miR-761    |
| 54 | bta-miR-1298   | 130 | bta-miR-199a-5p | 206 | bta-miR-323    | 282 | bta-miR-449d    | 358 | bta-miR-763    |
| 55 | bta-miR-1301   | 131 | bta-miR-199b    | 207 | bta-miR-324    | 283 | bta-miR-450a    | 359 | bta-miR-764    |

|    |                 |     |               |     |                |     |                |     |                |
|----|-----------------|-----|---------------|-----|----------------|-----|----------------|-----|----------------|
| 56 | bta-miR-1306    | 132 | bta-miR-199c  | 208 | bta-miR-326    | 284 | bta-miR-450b   | 360 | bta-miR-767    |
| 57 | bta-miR-1307    | 133 | bta-miR-19a   | 209 | bta-miR-328    | 285 | bta-miR-451    | 361 | bta-miR-769    |
| 58 | bta-miR-130a    | 134 | bta-miR-19b   | 210 | bta-miR-329a   | 286 | bta-miR-452    | 362 | bta-miR-873    |
| 59 | bta-miR-130b    | 135 | bta-miR-200a  | 211 | bta-miR-329b   | 287 | bta-miR-4523   | 363 | bta-miR-874    |
| 60 | bta-miR-132     | 136 | bta-miR-200b  | 212 | bta-miR-330    | 288 | bta-miR-453    | 364 | bta-miR-875    |
| 61 | bta-miR-133a    | 137 | bta-miR-200c  | 213 | bta-miR-331-3p | 289 | bta-miR-454    | 365 | bta-miR-876    |
| 62 | bta-miR-133b    | 138 | bta-miR-202   | 214 | bta-miR-331-5p | 290 | bta-miR-455-3p | 366 | bta-miR-877    |
| 63 | bta-miR-133c    | 139 | bta-miR-204   | 215 | bta-miR-335    | 291 | bta-miR-455-5p | 367 | bta-miR-885    |
| 64 | bta-miR-134     | 140 | bta-miR-205   | 216 | bta-miR-338    | 292 | bta-miR-483    | 368 | bta-miR-92a    |
| 65 | bta-miR-1343-3p | 141 | bta-miR-206   | 217 | bta-miR-339a   | 293 | bta-miR-484    | 369 | bta-miR-92b    |
| 66 | bta-miR-1343-5p | 142 | bta-miR-208a  | 218 | bta-miR-339b   | 294 | bta-miR-485    | 370 | bta-miR-93     |
| 67 | bta-miR-135a    | 143 | bta-miR-208b  | 219 | bta-miR-33a    | 295 | bta-miR-486    | 371 | bta-miR-935    |
| 68 | bta-miR-135b    | 144 | bta-miR-20a   | 220 | bta-miR-33b    | 296 | bta-miR-487a   | 372 | bta-miR-9-3p   |
| 69 | bta-miR-136     | 145 | bta-miR-20b   | 221 | bta-miR-340    | 297 | bta-miR-487b   | 373 | bta-miR-940    |
| 70 | bta-miR-137     | 146 | bta-miR-210   | 222 | bta-miR-342    | 298 | bta-miR-488    | 374 | bta-miR-95     |
| 71 | bta-miR-138     | 147 | bta-miR-211   | 223 | bta-miR-345-3p | 299 | bta-miR-489    | 375 | bta-miR-9-5p   |
| 72 | bta-miR-1388-3p | 148 | bta-miR-212   | 224 | bta-miR-345-5p | 300 | bta-miR-490    | 376 | bta-miR-96     |
| 73 | bta-miR-139     | 149 | bta-miR-21-3p | 225 | bta-miR-346    | 301 | bta-miR-491    | 377 | bta-miR-98     |
| 74 | bta-miR-140     | 150 | bta-miR-214   | 226 | bta-miR-34a    | 302 | bta-miR-493    | 378 | bta-miR-99a-3p |

|    |                |     |               |     |             |     |             |     |                |
|----|----------------|-----|---------------|-----|-------------|-----|-------------|-----|----------------|
| 75 | bta-miR-141    | 151 | bta-miR-215   | 227 | bta-miR-34b | 303 | bta-miR-494 | 379 | bta-miR-99a-5p |
| 76 | bta-miR-142-3p | 152 | bta-miR-21-5p | 228 | bta-miR-34c | 304 | bta-miR-495 | 380 | bta-miR-99b    |

---

**Supplementary Table S12.** Sequences of forward and reverse miR-216b target gene primers used for qPCR.

| <b>Gene</b>                     | <b>Product size</b> | <b>Forward primer (5'-3')</b> | <b>Reverse primer (5'-3')</b> | <b>NCBI accession number</b> |
|---------------------------------|---------------------|-------------------------------|-------------------------------|------------------------------|
| <i>K-RAS</i>                    | 133                 | GCCAGTTAGCTTGGTAGGTGT         | AACCAAGGCATGGCAACAAT          | NM_001110001.2               |
| <i>BECN1</i>                    | 182                 | GCCTCTGAAACTGGACACGA          | GGGGGATGAATCTGCGAGAG          | NM_001033627.2               |
| <i>JUN</i>                      | 140                 | TGCAAACGTTTTGAGGCGAG          | GGGCTTTAGTCCTCGGACAC          | NM_001077827.1               |
| <i><math>\beta</math>-ACTIN</i> | 158                 | TCGGTTGGATCGAGCATTCC          | CCTTAGAGAGAAGCGGGGTG          | NM_173979.3                  |

**Supplementary Figure S1. Preliminary results of polyspermic embryo induction.** **A.** Zygote polyspermy rates by different sperm concentrations in *in vitro* fertilization drops. **B.** Number of oocytes and mean and SEM (%) of zygote polyspermy rates by different sperm concentrations in *in vitro* fertilization drops. Groups: Conc-1:  $1 \times 10^6$  sperm/mL (n = 2); Conc-4:  $4 \times 10^6$  sperm/mL (n = 2); Conc-8:  $8 \times 10^6$  sperm/mL (n = 2); Conc-16:  $16 \times 10^6$  sperm/mL (n = 2). For this experiment, two straws from one frozen-thawed commercial semen batch were used to perform two replicates of *in vitro* embryo production. Zygotes were collected 12 hours post insemination (hpi) to evaluate embryo polyspermy rate. SEM: standard error of the mean.

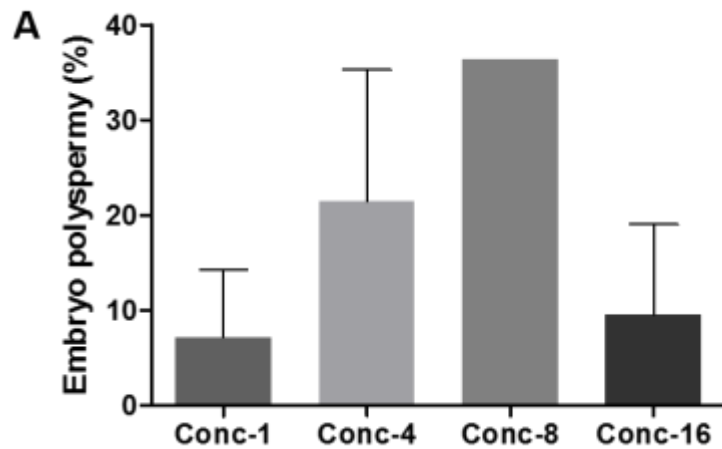

**B**

| Groups                       | Number of oocytes | Total of polyspermy (%) |
|------------------------------|-------------------|-------------------------|
| Conc-1 ( $1 \times 10^6$ )   | 29                | 7.1±7.1                 |
| Conc-4 ( $4 \times 10^6$ )   | 30                | 21.5±13.8               |
| Conc-8 ( $8 \times 10^6$ )   | 33                | 36.4±0                  |
| Conc-16 ( $16 \times 10^6$ ) | 34                | 9.5±9.5                 |
